# Supplementary material for: Genome-wide association study using haplotype alleles for the evaluation of reproductive traits in Nelore cattle
Source: PLoS One. 2018 Aug 8;13(8):e0201876. doi: 10.1371/journal.pone.0201876 (PMC6082543; doi:10.1371/journal.pone.0201876)
Supplement: S2 Dataset — (GZ) [file pone.0201876.s007.gz]

Archive with 3 entries (3 files):
- plos_gen2.bim
- plos_gen2.bed
- plos_gen2.fam
