# Supplementary material for: Genome-wide association study using haplotype alleles for the evaluation of reproductive traits in Nelore cattle
Source: PLoS One. 2018 Aug 8;13(8):e0201876. doi: 10.1371/journal.pone.0201876 (PMC6082543; doi:10.1371/journal.pone.0201876)
Supplement: S2 Dataset — (GZ) [file pone.0201876.s007.gz › plos_gen2.bim]

0	ARS-BFGL-BAC-11602	0	0	0	2
0	ARS-BFGL-BAC-13205	0	0	1	2
0	ARS-BFGL-BAC-19353	0	0	2	1
0	ARS-BFGL-BAC-27150	0	0	0	1
0	ARS-BFGL-BAC-31012	0	0	0	1
0	ARS-BFGL-BAC-32700	0	0	0	1
0	ARS-BFGL-BAC-35028	0	0	2	1
0	ARS-BFGL-BAC-35948	0	0	0	2
0	ARS-BFGL-NGS-100012	0	0	2	1
0	ARS-BFGL-NGS-100232	0	0	2	1
0	ARS-BFGL-NGS-100372	0	0	2	1
0	ARS-BFGL-NGS-100549	0	0	1	2
0	ARS-BFGL-NGS-100941	0	0	1	2
0	ARS-BFGL-NGS-101104	0	0	2	1
0	ARS-BFGL-NGS-101164	0	0	2	1
0	ARS-BFGL-NGS-101368	0	0	1	2
0	ARS-BFGL-NGS-101923	0	0	1	2
0	ARS-BFGL-NGS-102643	0	0	1	2
0	ARS-BFGL-NGS-102677	0	0	2	1
0	ARS-BFGL-NGS-102692	0	0	2	1
0	ARS-BFGL-NGS-102954	0	0	0	1
0	ARS-BFGL-NGS-103025	0	0	1	2
0	ARS-BFGL-NGS-103351	0	0	2	1
0	ARS-BFGL-NGS-103453	0	0	1	2
0	ARS-BFGL-NGS-103516	0	0	1	2
0	ARS-BFGL-NGS-103592	0	0	2	1
0	ARS-BFGL-NGS-103668	0	0	2	1
0	ARS-BFGL-NGS-103743	0	0	1	2
0	ARS-BFGL-NGS-103757	0	0	2	1
0	ARS-BFGL-NGS-104164	0	0	1	2
0	ARS-BFGL-NGS-104193	0	0	2	1
0	ARS-BFGL-NGS-10457	0	0	2	1
0	ARS-BFGL-NGS-104590	0	0	1	2
0	ARS-BFGL-NGS-104691	0	0	1	2
0	ARS-BFGL-NGS-105119	0	0	2	1
0	ARS-BFGL-NGS-105170	0	0	1	2
0	ARS-BFGL-NGS-106242	0	0	0	1
0	ARS-BFGL-NGS-106599	0	0	1	2
0	ARS-BFGL-NGS-106628	0	0	0	1
0	ARS-BFGL-NGS-106856	0	0	2	1
0	ARS-BFGL-NGS-107158	0	0	2	1
0	ARS-BFGL-NGS-108506	0	0	1	2
0	ARS-BFGL-NGS-108764	0	0	2	1
0	ARS-BFGL-NGS-108922	0	0	0	1
0	ARS-BFGL-NGS-108995	0	0	2	1
0	ARS-BFGL-NGS-10918	0	0	1	2
0	ARS-BFGL-NGS-109769	0	0	2	1
0	ARS-BFGL-NGS-109976	0	0	1	2
0	ARS-BFGL-NGS-110034	0	0	2	1
0	ARS-BFGL-NGS-110081	0	0	1	2
0	ARS-BFGL-NGS-110436	0	0	1	2
0	ARS-BFGL-NGS-110451	0	0	1	2
0	ARS-BFGL-NGS-110582	0	0	1	2
0	ARS-BFGL-NGS-110734	0	0	1	2
0	ARS-BFGL-NGS-110888	0	0	2	1
0	ARS-BFGL-NGS-111415	0	0	2	1
0	ARS-BFGL-NGS-111441	0	0	1	2
0	ARS-BFGL-NGS-111790	0	0	2	1
0	ARS-BFGL-NGS-111874	0	0	2	1
0	ARS-BFGL-NGS-111877	0	0	2	1
0	ARS-BFGL-NGS-112002	0	0	0	1
0	ARS-BFGL-NGS-112087	0	0	1	2
0	ARS-BFGL-NGS-112303	0	0	1	2
0	ARS-BFGL-NGS-112620	0	0	2	1
0	ARS-BFGL-NGS-112902	0	0	2	1
0	ARS-BFGL-NGS-112991	0	0	2	1
0	ARS-BFGL-NGS-113446	0	0	2	1
0	ARS-BFGL-NGS-113514	0	0	2	1
0	ARS-BFGL-NGS-113869	0	0	2	1
0	ARS-BFGL-NGS-113903	0	0	1	2
0	ARS-BFGL-NGS-113945	0	0	1	2
0	ARS-BFGL-NGS-114104	0	0	2	1
0	ARS-BFGL-NGS-114435	0	0	2	1
0	ARS-BFGL-NGS-11454	0	0	0	1
0	ARS-BFGL-NGS-114867	0	0	1	2
0	ARS-BFGL-NGS-114952	0	0	1	2
0	ARS-BFGL-NGS-115422	0	0	2	1
0	ARS-BFGL-NGS-115451	0	0	1	2
0	ARS-BFGL-NGS-115471	0	0	2	1
0	ARS-BFGL-NGS-115677	0	0	1	2
0	ARS-BFGL-NGS-115806	0	0	1	2
0	ARS-BFGL-NGS-115911	0	0	2	1
0	ARS-BFGL-NGS-116174	0	0	1	2
0	ARS-BFGL-NGS-11618	0	0	2	1
0	ARS-BFGL-NGS-116271	0	0	1	2
0	ARS-BFGL-NGS-116563	0	0	1	2
0	ARS-BFGL-NGS-116644	0	0	1	2
0	ARS-BFGL-NGS-116695	0	0	2	1
0	ARS-BFGL-NGS-116907	0	0	1	2
0	ARS-BFGL-NGS-117051	0	0	2	1
0	ARS-BFGL-NGS-117179	0	0	0	1
0	ARS-BFGL-NGS-11741	0	0	2	1
0	ARS-BFGL-NGS-117896	0	0	1	2
0	ARS-BFGL-NGS-117911	0	0	1	2
0	ARS-BFGL-NGS-118144	0	0	2	1
0	ARS-BFGL-NGS-118565	0	0	2	1
0	ARS-BFGL-NGS-118619	0	0	2	1
0	ARS-BFGL-NGS-118950	0	0	2	1
0	ARS-BFGL-NGS-118954	0	0	2	1
0	ARS-BFGL-NGS-119099	0	0	1	2
0	ARS-BFGL-NGS-119317	0	0	0	2
0	ARS-BFGL-NGS-119368	0	0	2	1
0	ARS-BFGL-NGS-119436	0	0	0	2
0	ARS-BFGL-NGS-119439	0	0	0	2
0	ARS-BFGL-NGS-119598	0	0	2	1
0	ARS-BFGL-NGS-119666	0	0	0	1
0	ARS-BFGL-NGS-11968	0	0	2	1
0	ARS-BFGL-NGS-119908	0	0	1	2
0	ARS-BFGL-NGS-12139	0	0	1	2
0	ARS-BFGL-NGS-12151	0	0	2	1
0	ARS-BFGL-NGS-12492	0	0	2	1
0	ARS-BFGL-NGS-12947	0	0	1	2
0	ARS-BFGL-NGS-13306	0	0	2	1
0	ARS-BFGL-NGS-14098	0	0	1	2
0	ARS-BFGL-NGS-14613	0	0	1	2
0	ARS-BFGL-NGS-14914	0	0	2	1
0	ARS-BFGL-NGS-14974	0	0	1	2
0	ARS-BFGL-NGS-15093	0	0	2	1
0	ARS-BFGL-NGS-152	0	0	1	2
0	ARS-BFGL-NGS-15215	0	0	2	1
0	ARS-BFGL-NGS-15914	0	0	1	2
0	ARS-BFGL-NGS-1695	0	0	1	2
0	ARS-BFGL-NGS-17227	0	0	0	1
0	ARS-BFGL-NGS-17607	0	0	2	1
0	ARS-BFGL-NGS-17854	0	0	2	1
0	ARS-BFGL-NGS-17889	0	0	1	2
0	ARS-BFGL-NGS-18050	0	0	1	2
0	ARS-BFGL-NGS-18790	0	0	2	1
0	ARS-BFGL-NGS-1913	0	0	2	1
0	ARS-BFGL-NGS-19136	0	0	1	2
0	ARS-BFGL-NGS-19402	0	0	2	1
0	ARS-BFGL-NGS-19632	0	0	1	2
0	ARS-BFGL-NGS-19710	0	0	2	1
0	ARS-BFGL-NGS-19723	0	0	0	1
0	ARS-BFGL-NGS-20343	0	0	1	2
0	ARS-BFGL-NGS-20827	0	0	2	1
0	ARS-BFGL-NGS-21001	0	0	2	1
0	ARS-BFGL-NGS-21154	0	0	2	1
0	ARS-BFGL-NGS-21162	0	0	2	1
0	ARS-BFGL-NGS-23524	0	0	0	1
0	ARS-BFGL-NGS-2356	0	0	1	2
0	ARS-BFGL-NGS-24295	0	0	1	2
0	ARS-BFGL-NGS-24368	0	0	2	1
0	ARS-BFGL-NGS-2467	0	0	1	2
0	ARS-BFGL-NGS-25089	0	0	1	2
0	ARS-BFGL-NGS-25510	0	0	1	2
0	ARS-BFGL-NGS-25631	0	0	1	2
0	ARS-BFGL-NGS-25996	0	0	2	1
0	ARS-BFGL-NGS-26627	0	0	2	1
0	ARS-BFGL-NGS-27334	0	0	1	2
0	ARS-BFGL-NGS-27970	0	0	2	1
0	ARS-BFGL-NGS-28219	0	0	2	1
0	ARS-BFGL-NGS-28227	0	0	2	1
0	ARS-BFGL-NGS-28263	0	0	2	1
0	ARS-BFGL-NGS-28338	0	0	2	1
0	ARS-BFGL-NGS-28372	0	0	1	2
0	ARS-BFGL-NGS-29341	0	0	2	1
0	ARS-BFGL-NGS-29577	0	0	2	1
0	ARS-BFGL-NGS-30528	0	0	2	1
0	ARS-BFGL-NGS-31235	0	0	1	2
0	ARS-BFGL-NGS-3125	0	0	2	1
0	ARS-BFGL-NGS-31515	0	0	2	1
0	ARS-BFGL-NGS-3238	0	0	0	2
0	ARS-BFGL-NGS-32657	0	0	1	2
0	ARS-BFGL-NGS-32812	0	0	0	1
0	ARS-BFGL-NGS-32847	0	0	0	1
0	ARS-BFGL-NGS-33448	0	0	1	2
0	ARS-BFGL-NGS-33654	0	0	2	1
0	ARS-BFGL-NGS-33890	0	0	1	2
0	ARS-BFGL-NGS-33908	0	0	2	1
0	ARS-BFGL-NGS-3396	0	0	1	2
0	ARS-BFGL-NGS-34294	0	0	1	2
0	ARS-BFGL-NGS-34722	0	0	1	2
0	ARS-BFGL-NGS-3513	0	0	2	1
0	ARS-BFGL-NGS-35391	0	0	2	1
0	ARS-BFGL-NGS-35436	0	0	2	1
0	ARS-BFGL-NGS-3579	0	0	2	1
0	ARS-BFGL-NGS-370	0	0	0	1
0	ARS-BFGL-NGS-37828	0	0	1	2
0	ARS-BFGL-NGS-38261	0	0	2	1
0	ARS-BFGL-NGS-38345	0	0	1	2
0	ARS-BFGL-NGS-39701	0	0	2	1
0	ARS-BFGL-NGS-40507	0	0	1	2
0	ARS-BFGL-NGS-40554	0	0	2	1
0	ARS-BFGL-NGS-40750	0	0	2	1
0	ARS-BFGL-NGS-41280	0	0	2	1
0	ARS-BFGL-NGS-41309	0	0	2	1
0	ARS-BFGL-NGS-41326	0	0	2	1
0	ARS-BFGL-NGS-41701	0	0	2	1
0	ARS-BFGL-NGS-41788	0	0	2	1
0	ARS-BFGL-NGS-41853	0	0	1	2
0	ARS-BFGL-NGS-41997	0	0	0	2
0	ARS-BFGL-NGS-42226	0	0	0	1
0	ARS-BFGL-NGS-42426	0	0	2	1
0	ARS-BFGL-NGS-42451	0	0	2	1
0	ARS-BFGL-NGS-42540	0	0	0	1
0	ARS-BFGL-NGS-42897	0	0	2	1
0	ARS-BFGL-NGS-42980	0	0	2	1
0	ARS-BFGL-NGS-43949	0	0	0	2
0	ARS-BFGL-NGS-4428	0	0	1	2
0	ARS-BFGL-NGS-45087	0	0	2	1
0	ARS-BFGL-NGS-4864	0	0	2	1
0	ARS-BFGL-NGS-4903	0	0	2	1
0	ARS-BFGL-NGS-51061	0	0	2	1
0	ARS-BFGL-NGS-52549	0	0	1	2
0	ARS-BFGL-NGS-52883	0	0	2	1
0	ARS-BFGL-NGS-5326	0	0	0	2
0	ARS-BFGL-NGS-53304	0	0	2	1
0	ARS-BFGL-NGS-53564	0	0	2	1
0	ARS-BFGL-NGS-5557	0	0	2	1
0	ARS-BFGL-NGS-55625	0	0	1	2
0	ARS-BFGL-NGS-57989	0	0	1	2
0	ARS-BFGL-NGS-59120	0	0	2	1
0	ARS-BFGL-NGS-59850	0	0	2	1
0	ARS-BFGL-NGS-60445	0	0	2	1
0	ARS-BFGL-NGS-60707	0	0	2	1
0	ARS-BFGL-NGS-6072	0	0	1	2
0	ARS-BFGL-NGS-62273	0	0	1	2
0	ARS-BFGL-NGS-6282	0	0	2	1
0	ARS-BFGL-NGS-62923	0	0	1	2
0	ARS-BFGL-NGS-64102	0	0	2	1
0	ARS-BFGL-NGS-64128	0	0	1	2
0	ARS-BFGL-NGS-65105	0	0	1	2
0	ARS-BFGL-NGS-65959	0	0	2	1
0	ARS-BFGL-NGS-66371	0	0	2	1
0	ARS-BFGL-NGS-66672	0	0	2	1
0	ARS-BFGL-NGS-68401	0	0	0	1
0	ARS-BFGL-NGS-6911	0	0	2	1
0	ARS-BFGL-NGS-70477	0	0	2	1
0	ARS-BFGL-NGS-70679	0	0	0	2
0	ARS-BFGL-NGS-7076	0	0	2	1
0	ARS-BFGL-NGS-71080	0	0	0	1
0	ARS-BFGL-NGS-71202	0	0	2	1
0	ARS-BFGL-NGS-72995	0	0	1	2
0	ARS-BFGL-NGS-73023	0	0	2	1
0	ARS-BFGL-NGS-74975	0	0	2	1
0	ARS-BFGL-NGS-75252	0	0	2	1
0	ARS-BFGL-NGS-7598	0	0	2	1
0	ARS-BFGL-NGS-76174	0	0	1	2
0	ARS-BFGL-NGS-76242	0	0	2	1
0	ARS-BFGL-NGS-76855	0	0	2	1
0	ARS-BFGL-NGS-77775	0	0	2	1
0	ARS-BFGL-NGS-7897	0	0	2	1
0	ARS-BFGL-NGS-79094	0	0	1	2
0	ARS-BFGL-NGS-79716	0	0	2	1
0	ARS-BFGL-NGS-79958	0	0	2	1
0	ARS-BFGL-NGS-81524	0	0	2	1
0	ARS-BFGL-NGS-81795	0	0	1	2
0	ARS-BFGL-NGS-82575	0	0	1	2
0	ARS-BFGL-NGS-85245	0	0	2	1
0	ARS-BFGL-NGS-86525	0	0	0	1
0	ARS-BFGL-NGS-88060	0	0	2	1
0	ARS-BFGL-NGS-88229	0	0	2	1
0	ARS-BFGL-NGS-90273	0	0	0	2
0	ARS-BFGL-NGS-90759	0	0	1	2
0	ARS-BFGL-NGS-90942	0	0	0	2
0	ARS-BFGL-NGS-9271	0	0	1	2
0	ARS-BFGL-NGS-93180	0	0	2	1
0	ARS-BFGL-NGS-94265	0	0	1	2
0	ARS-BFGL-NGS-9594	0	0	2	1
0	ARS-BFGL-NGS-96394	0	0	0	1
0	ARS-BFGL-NGS-96829	0	0	1	2
0	ARS-BFGL-NGS-97046	0	0	2	1
0	ARS-BFGL-NGS-97560	0	0	2	1
0	ARS-BFGL-NGS-98530	0	0	2	1
0	ARS-BFGL-NGS-99140	0	0	2	1
0	ARS-USMARC-618	0	0	2	1
0	BovineHD3300000001	0	0	0	1
0	BovineHD3300000004	0	0	0	1
0	BovineHD3300000005	0	0	1	2
0	BovineHD3300000006	0	0	0	1
0	BovineHD3300000007	0	0	0	2
0	BovineHD3300000008	0	0	0	2
0	BovineHD3300000011	0	0	2	1
0	BovineHD3300000012	0	0	2	1
0	BovineHD3300000014	0	0	2	1
0	BovineHD3300000015	0	0	2	1
0	BovineHD3300000016	0	0	2	1
0	BovineHD3300000017	0	0	2	1
0	BovineHD3300000018	0	0	1	2
0	BovineHD3300000019	0	0	1	2
0	BovineHD3300000020	0	0	2	1
0	BovineHD3300000025	0	0	2	1
0	BovineHD3300000026	0	0	0	2
0	BovineHD3300000027	0	0	0	2
0	BovineHD3300000029	0	0	2	1
0	BovineHD3300000030	0	0	0	2
0	BovineHD3300000031	0	0	0	2
0	BovineHD3300000033	0	0	2	1
0	BovineHD3300000035	0	0	1	2
0	BovineHD3300000036	0	0	0	1
0	BovineHD3300000038	0	0	0	2
0	BovineHD3300000040	0	0	2	1
0	BovineHD3300000041	0	0	2	1
0	BovineHD3300000042	0	0	1	2
0	BovineHD3300000045	0	0	0	2
0	BovineHD3300000046	0	0	1	2
0	BovineHD3300000049	0	0	2	1
0	BovineHD3300000050	0	0	2	1
0	BovineHD3300000051	0	0	0	1
0	BovineHD3300000052	0	0	2	1
0	BovineHD3300000053	0	0	2	1
0	BovineHD3300000061	0	0	2	1
0	BovineHD3300000062	0	0	0	2
0	BovineHD3300000064	0	0	0	1
0	BovineHD3300000065	0	0	0	2
0	BovineHD3300000067	0	0	0	2
0	BovineHD3300000068	0	0	0	2
0	BovineHD3300000070	0	0	2	1
0	BovineHD3300000074	0	0	1	2
0	BovineHD3300000075	0	0	2	1
0	BovineHD3300000076	0	0	1	2
0	BovineHD3300000077	0	0	0	1
0	BovineHD3300000078	0	0	1	2
0	BovineHD3300000079	0	0	0	1
0	BovineHD3300000080	0	0	0	1
0	BovineHD3300000081	0	0	2	1
0	BovineHD3300000082	0	0	1	2
0	BovineHD3300000083	0	0	0	2
0	BovineHD3300000084	0	0	0	1
0	BovineHD3300000085	0	0	0	2
0	BovineHD3300000086	0	0	2	1
0	BovineHD3300000087	0	0	1	2
0	BovineHD3300000088	0	0	2	1
0	BovineHD3300000089	0	0	1	2
0	BovineHD3300000090	0	0	2	1
0	BovineHD3300000091	0	0	0	2
0	BovineHD3300000092	0	0	2	1
0	BovineHD3300000094	0	0	2	1
0	BovineHD3300000095	0	0	2	1
0	BovineHD3300000096	0	0	1	2
0	BovineHD3300000097	0	0	0	1
0	BovineHD3300000098	0	0	0	2
0	BovineHD3300000100	0	0	0	2
0	BovineHD3300000101	0	0	0	1
0	BovineHD3300000102	0	0	0	1
0	BovineHD3300000103	0	0	1	2
0	BovineHD3300000105	0	0	0	2
0	BovineHD3300000106	0	0	2	1
0	BovineHD3300000107	0	0	1	2
0	BovineHD3300000108	0	0	0	2
0	BovineHD3300000110	0	0	1	2
0	BovineHD3300000112	0	0	0	2
0	BovineHD3300000113	0	0	0	2
0	BovineHD3300000115	0	0	2	1
0	BovineHD3300000116	0	0	1	2
0	BovineHD3300000117	0	0	0	2
0	BovineHD3300000130	0	0	0	2
0	BovineHD3300000131	0	0	0	2
0	BovineHD3300000136	0	0	0	1
0	BovineHD3300000138	0	0	2	1
0	BovineHD3300000139	0	0	1	2
0	BovineHD3300000140	0	0	2	1
0	BovineHD3300000141	0	0	2	1
0	BovineHD3300000143	0	0	0	1
0	BovineHD3300000147	0	0	0	1
0	BovineHD3300000150	0	0	2	1
0	BovineHD3300000152	0	0	2	1
0	BovineHD3300000153	0	0	0	2
0	BovineHD3300000154	0	0	0	1
0	BovineHD3300000155	0	0	0	1
0	BovineHD3300000156	0	0	2	1
0	BovineHD3300000157	0	0	1	2
0	BovineHD3300000160	0	0	0	2
0	BovineHD3300000162	0	0	1	2
0	BovineHD3300000163	0	0	2	1
0	BovineHD3300000165	0	0	0	1
0	BovineHD3300000166	0	0	1	2
0	BovineHD3300000175	0	0	2	1
0	BovineHD3300000176	0	0	1	2
0	BovineHD3300000177	0	0	0	1
0	BovineHD3300000178	0	0	2	1
0	BovineHD3300000179	0	0	1	2
0	BovineHD3300000180	0	0	1	2
0	BovineHD3300000181	0	0	1	2
0	BovineHD3300000184	0	0	2	1
0	BovineHD3300000185	0	0	1	2
0	BovineHD3300000186	0	0	0	2
0	BovineHD3300000187	0	0	2	1
0	BovineHD3300000188	0	0	1	2
0	BovineHD3300000189	0	0	0	2
0	BovineHD3300000190	0	0	2	1
0	BovineHD3300000192	0	0	0	1
0	BovineHD3300000194	0	0	2	1
0	BovineHD3300000195	0	0	2	1
0	BovineHD3300000196	0	0	1	2
0	BovineHD3300000197	0	0	1	2
0	BovineHD3300000198	0	0	1	2
0	BovineHD3300000199	0	0	2	1
0	BovineHD3300000200	0	0	2	1
0	BovineHD3300000201	0	0	2	1
0	BovineHD3300000202	0	0	2	1
0	BovineHD3300000203	0	0	1	2
0	BovineHD3300000204	0	0	2	1
0	BovineHD3300000205	0	0	2	1
0	BovineHD3300000206	0	0	2	1
0	BovineHD3300000207	0	0	2	1
0	BovineHD3300000208	0	0	0	2
0	BovineHD3300000209	0	0	2	1
0	BovineHD3300000210	0	0	0	1
0	BovineHD3300000211	0	0	0	2
0	BovineHD3300000212	0	0	1	2
0	BovineHD3300000214	0	0	2	1
0	BovineHD3300000215	0	0	2	1
0	BovineHD3300000216	0	0	2	1
0	BovineHD3300000217	0	0	1	2
0	BovineHD3300000218	0	0	2	1
0	BovineHD3300000219	0	0	2	1
0	BovineHD3300000220	0	0	1	2
0	BovineHD3300000221	0	0	1	2
0	BovineHD3300000222	0	0	1	2
0	BovineHD3300000224	0	0	2	1
0	BovineHD3300000225	0	0	2	1
0	BovineHD3300000226	0	0	0	2
0	BovineHD3300000227	0	0	1	2
0	BovineHD3300000228	0	0	2	1
0	BovineHD3300000229	0	0	2	1
0	BovineHD3300000230	0	0	1	2
0	BovineHD3300000231	0	0	0	2
0	BovineHD3300000232	0	0	2	1
0	BovineHD3300000233	0	0	1	2
0	BovineHD3300000234	0	0	2	1
0	BovineHD3300000235	0	0	2	1
0	BovineHD3300000236	0	0	2	1
0	BovineHD3300000237	0	0	0	1
0	BovineHD3300000238	0	0	2	1
0	BovineHD3300000239	0	0	2	1
0	BovineHD3300000240	0	0	2	1
0	BovineHD3300000241	0	0	1	2
0	BovineHD3300000242	0	0	1	2
0	BovineHD3300000243	0	0	1	2
0	BovineHD3300000244	0	0	2	1
0	BovineHD3300000245	0	0	0	2
0	BovineHD3300000246	0	0	2	1
0	BovineHD3300000247	0	0	2	1
0	BovineHD3300000248	0	0	2	1
0	BovineHD3300000249	0	0	1	2
0	BovineHD3300000250	0	0	1	2
0	BovineHD3300000251	0	0	1	2
0	BovineHD3300000252	0	0	2	1
0	BovineHD3300000253	0	0	2	1
0	BovineHD3300000254	0	0	1	2
0	BovineHD3300000255	0	0	1	2
0	BovineHD3300000256	0	0	2	1
0	BovineHD3300000257	0	0	1	2
0	BovineHD3300000258	0	0	1	2
0	BovineHD3300000259	0	0	2	1
0	BovineHD3300000260	0	0	2	1
0	BovineHD3300000261	0	0	1	2
0	BovineHD3300000263	0	0	0	2
0	BovineHD3300000264	0	0	1	2
0	BovineHD3300000265	0	0	1	2
0	BovineHD3300000266	0	0	1	2
0	BovineHD3300000267	0	0	2	1
0	BovineHD3300000268	0	0	2	1
0	BovineHD3300000269	0	0	0	2
0	BovineHD3300000270	0	0	2	1
0	BovineHD3300000271	0	0	2	1
0	BovineHD3300000272	0	0	2	1
0	BovineHD3300000273	0	0	1	2
0	BovineHD3300000275	0	0	0	1
0	BovineHD3300000276	0	0	1	2
0	BovineHD3300000277	0	0	2	1
0	BovineHD3300000278	0	0	2	1
0	BovineHD3300000279	0	0	0	2
0	BovineHD3300000280	0	0	1	2
0	BovineHD3300000281	0	0	1	2
0	BovineHD3300000282	0	0	2	1
0	BovineHD3300000283	0	0	2	1
0	BovineHD3300000284	0	0	0	1
0	BovineHD3300000285	0	0	1	2
0	BovineHD3300000286	0	0	1	2
0	BovineHD3300000287	0	0	1	2
0	BovineHD3300000288	0	0	1	2
0	BovineHD3300000289	0	0	2	1
0	BovineHD3300000290	0	0	1	2
0	BovineHD3300000291	0	0	1	2
0	BovineHD3300000292	0	0	2	1
0	BovineHD3300000293	0	0	1	2
0	BovineHD3300000294	0	0	2	1
0	BovineHD3300000295	0	0	0	2
0	BovineHD3300000296	0	0	2	1
0	BovineHD3300000297	0	0	2	1
0	BovineHD3300000298	0	0	1	2
0	BovineHD3300000300	0	0	1	2
0	BovineHD3300000301	0	0	2	1
0	BovineHD3300000302	0	0	1	2
0	BovineHD3300000304	0	0	1	2
0	BovineHD3300000305	0	0	1	2
0	BovineHD3300000306	0	0	1	2
0	BovineHD3300000307	0	0	0	1
0	BovineHD3300000308	0	0	2	1
0	BovineHD3300000309	0	0	0	2
0	BovineHD3300000311	0	0	2	1
0	BovineHD3300000312	0	0	2	1
0	BovineHD3300000313	0	0	0	1
0	BovineHD3300000314	0	0	1	2
0	BovineHD3300000315	0	0	1	2
0	BovineHD3300000316	0	0	1	2
0	BovineHD3300000319	0	0	1	2
0	BovineHD3300000320	0	0	0	1
0	BovineHD3300000321	0	0	2	1
0	BovineHD3300000322	0	0	2	1
0	BovineHD3300000323	0	0	2	1
0	BovineHD3300000324	0	0	2	1
0	BovineHD3300000325	0	0	0	2
0	BovineHD3300000326	0	0	2	1
0	BovineHD3300000327	0	0	1	2
0	BovineHD3300000328	0	0	2	1
0	BovineHD3300000329	0	0	0	1
0	BovineHD3300000330	0	0	0	2
0	BovineHD3300000331	0	0	2	1
0	BovineHD3300000332	0	0	2	1
0	BovineHD3300000333	0	0	0	2
0	BovineHD3300000335	0	0	0	1
0	BovineHD3300000336	0	0	2	1
0	BovineHD3300000337	0	0	2	1
0	BovineHD3300000338	0	0	2	1
0	BovineHD3300000339	0	0	0	2
0	BovineHD3300000340	0	0	0	1
0	BovineHD3300000341	0	0	0	2
0	BovineHD3300000342	0	0	0	1
0	BovineHD3300000343	0	0	1	2
0	BovineHD3300000344	0	0	2	1
0	BovineHD3300000345	0	0	1	2
0	BovineHD3300000346	0	0	2	1
0	BovineHD3300000347	0	0	1	2
0	BovineHD3300000348	0	0	2	1
0	BovineHD3300000349	0	0	2	1
0	BovineHD3300000350	0	0	1	2
0	BovineHD3300000351	0	0	1	2
0	BovineHD3300000352	0	0	0	1
0	BovineHD3300000353	0	0	1	2
0	BovineHD3300000354	0	0	0	1
0	BovineHD3300000355	0	0	0	1
0	BovineHD3300000356	0	0	1	2
0	BovineHD3300000357	0	0	0	1
0	BovineHD3300000358	0	0	2	1
0	BovineHD3300000359	0	0	1	2
0	BovineHD3300000360	0	0	1	2
0	BovineHD3300000361	0	0	2	1
0	BovineHD3300000362	0	0	1	2
0	BovineHD3300000363	0	0	1	2
0	BovineHD3300000365	0	0	2	1
0	BovineHD3300000366	0	0	1	2
0	BovineHD3300000367	0	0	2	1
0	BovineHD3300000368	0	0	2	1
0	BovineHD3300000369	0	0	2	1
0	BovineHD3300000370	0	0	1	2
0	BovineHD3300000371	0	0	1	2
0	BovineHD3300000372	0	0	1	2
0	BovineHD3300000373	0	0	2	1
0	BovineHD3300000376	0	0	0	2
0	BovineHD3300000377	0	0	2	1
0	BovineHD3300000379	0	0	1	2
0	BovineHD3300000380	0	0	2	1
0	BovineHD3300000381	0	0	2	1
0	BovineHD3300000382	0	0	1	2
0	BovineHD3300000383	0	0	1	2
0	BovineHD3300000384	0	0	2	1
0	BovineHD3300000385	0	0	2	1
0	BovineHD3300000386	0	0	2	1
0	BovineHD3300000387	0	0	2	1
0	BovineHD3300000388	0	0	2	1
0	BovineHD3300000389	0	0	1	2
0	BovineHD3300000390	0	0	1	2
0	BovineHD3300000391	0	0	2	1
0	BovineHD3300000392	0	0	0	1
0	BovineHD3300000393	0	0	2	1
0	BovineHD3300000394	0	0	1	2
0	BovineHD3300000395	0	0	1	2
0	BovineHD3300000397	0	0	2	1
0	BovineHD3300000398	0	0	2	1
0	BovineHD3300000399	0	0	1	2
0	BovineHD3300000400	0	0	2	1
0	BovineHD3300000401	0	0	1	2
0	BovineHD3300000402	0	0	2	1
0	BovineHD3300000403	0	0	1	2
0	BovineHD3300000406	0	0	2	1
0	BovineHD3300000407	0	0	2	1
0	BovineHD3300000408	0	0	1	2
0	BovineHD3300000409	0	0	2	1
0	BovineHD3300000410	0	0	1	2
0	BovineHD3300000411	0	0	0	2
0	BovineHD3300000412	0	0	0	1
0	BovineHD3300000413	0	0	2	1
0	BovineHD3300000414	0	0	2	1
0	BovineHD3300000415	0	0	2	1
0	BovineHD3300000416	0	0	2	1
0	BovineHD3300000418	0	0	1	2
0	BovineHD3300000419	0	0	2	1
0	BovineHD3300000420	0	0	2	1
0	BovineHD3300000421	0	0	2	1
0	BovineHD3300000422	0	0	2	1
0	BovineHD3300000423	0	0	0	1
0	BovineHD3300000424	0	0	2	1
0	BovineHD3300000425	0	0	2	1
0	BovineHD3300000426	0	0	1	2
0	BovineHD3300000427	0	0	2	1
0	BovineHD3300000428	0	0	2	1
0	BovineHD3300000429	0	0	2	1
0	BovineHD3300000430	0	0	0	2
0	BovineHD3300000431	0	0	2	1
0	BovineHD3300000434	0	0	2	1
0	BovineHD3300000435	0	0	1	2
0	BovineHD3300000436	0	0	2	1
0	BovineHD3300000437	0	0	1	2
0	BovineHD3300000438	0	0	2	1
0	BovineHD3300000439	0	0	1	2
0	BovineHD3300000440	0	0	1	2
0	BovineHD3300000441	0	0	1	2
0	BovineHD3300000442	0	0	2	1
0	BovineHD3300000444	0	0	2	1
0	BovineHD3300000445	0	0	0	2
0	BovineHD3300000447	0	0	2	1
0	BovineHD3300000448	0	0	1	2
0	BovineHD3300000449	0	0	2	1
0	BovineHD3300000450	0	0	0	1
0	BovineHD3300000451	0	0	0	1
0	BovineHD3300000452	0	0	0	1
0	BovineHD3300000454	0	0	0	2
0	BovineHD3300000455	0	0	0	1
0	BovineHD3300000456	0	0	1	2
0	BovineHD3300000457	0	0	2	1
0	BovineHD3300000458	0	0	0	1
0	BovineHD3300000459	0	0	2	1
0	BovineHD3300000460	0	0	2	1
0	BovineHD3300000461	0	0	1	2
0	BovineHD3300000462	0	0	0	2
0	BovineHD3300000463	0	0	0	1
0	BovineHD3300000464	0	0	1	2
0	BovineHD3300000465	0	0	2	1
0	BovineHD3300000466	0	0	0	1
0	BovineHD3300000467	0	0	1	2
0	BovineHD3300000468	0	0	2	1
0	BovineHD3300000469	0	0	0	2
0	BovineHD3300000471	0	0	2	1
0	BovineHD3300000472	0	0	2	1
0	BovineHD3300000473	0	0	2	1
0	BovineHD3300000474	0	0	0	2
0	BovineHD3300000475	0	0	0	1
0	BovineHD3300000476	0	0	1	2
0	BovineHD3300000478	0	0	2	1
0	BovineHD3300000479	0	0	2	1
0	BovineHD3300000480	0	0	0	1
0	BovineHD3300000481	0	0	0	1
0	BovineHD3300000482	0	0	0	1
0	BovineHD3300000483	0	0	0	2
0	BovineHD3300000484	0	0	2	1
0	BovineHD3300000485	0	0	2	1
0	BovineHD3300000486	0	0	2	1
0	BovineHD3300000487	0	0	2	1
0	BovineHD3300000488	0	0	2	1
0	BovineHD3300000489	0	0	0	2
0	BovineHD3300000490	0	0	0	2
0	BovineHD3300000491	0	0	1	2
0	BovineHD3300000492	0	0	1	2
0	BovineHD3300000493	0	0	2	1
0	BovineHD3300000494	0	0	2	1
0	BovineHD3300000495	0	0	2	1
0	BovineHD3300000496	0	0	2	1
0	BovineHD3300000497	0	0	1	2
0	BovineHD3300000498	0	0	0	1
0	BovineHD3300000499	0	0	2	1
0	BovineHD3300000500	0	0	1	2
0	BovineHD3300000503	0	0	1	2
0	BovineHD3300000504	0	0	2	1
0	BovineHD3300000506	0	0	0	2
0	BovineHD3300000507	0	0	1	2
0	BovineHD3300000508	0	0	2	1
0	BovineHD3300000509	0	0	2	1
0	BovineHD3300000510	0	0	0	1
0	BovineHD3300000511	0	0	2	1
0	BovineHD3300000512	0	0	1	2
0	BovineHD3300000513	0	0	1	2
0	BovineHD3300000514	0	0	2	1
0	BovineHD3300000516	0	0	0	1
0	BovineHD3300000517	0	0	2	1
0	BovineHD3300000518	0	0	2	1
0	BovineHD3300000519	0	0	2	1
0	BovineHD3300000521	0	0	0	2
0	BovineHD3300000522	0	0	2	1
0	BovineHD3300000523	0	0	2	1
0	BovineHD3300000524	0	0	0	1
0	BovineHD3300000525	0	0	2	1
0	BovineHD3300000526	0	0	1	2
0	BovineHD3300000527	0	0	2	1
0	BovineHD3300000528	0	0	2	1
0	BovineHD3300000529	0	0	2	1
0	BovineHD3300000530	0	0	1	2
0	BovineHD3300000531	0	0	2	1
0	BovineHD3300000532	0	0	1	2
0	BovineHD3300000533	0	0	2	1
0	BovineHD3300000534	0	0	0	1
0	BovineHD3300000535	0	0	1	2
0	BovineHD3300000536	0	0	1	2
0	BovineHD3300000537	0	0	1	2
0	BovineHD3300000538	0	0	2	1
0	BovineHD3300000539	0	0	2	1
0	BovineHD3300000540	0	0	2	1
0	BovineHD3300000541	0	0	1	2
0	BovineHD3300000542	0	0	0	1
0	BovineHD3300000544	0	0	2	1
0	BovineHD3300000545	0	0	2	1
0	BovineHD3300000546	0	0	2	1
0	BovineHD3300000547	0	0	1	2
0	BovineHD3300000548	0	0	2	1
0	BovineHD3300000549	0	0	0	1
0	BovineHD3300000550	0	0	2	1
0	BovineHD3300000551	0	0	2	1
0	BovineHD3300000552	0	0	2	1
0	BovineHD3300000553	0	0	1	2
0	BovineHD3300000554	0	0	1	2
0	BovineHD3300000555	0	0	2	1
0	BovineHD3300000556	0	0	1	2
0	BovineHD3300000557	0	0	2	1
0	BovineHD3300000559	0	0	2	1
0	BovineHD3300000560	0	0	2	1
0	BovineHD3300000561	0	0	2	1
0	BovineHD3300000563	0	0	0	1
0	BovineHD3300000564	0	0	0	2
0	BovineHD3300000565	0	0	1	2
0	BovineHD3300000566	0	0	1	2
0	BovineHD3300000567	0	0	2	1
0	BovineHD3300000568	0	0	2	1
0	BovineHD3300000569	0	0	1	2
0	BovineHD3300000571	0	0	0	2
0	BovineHD3300000572	0	0	1	2
0	BovineHD3300000573	0	0	0	1
0	BovineHD3300000574	0	0	2	1
0	BovineHD3300000575	0	0	2	1
0	BovineHD3300000576	0	0	2	1
0	BovineHD3300000577	0	0	0	1
0	BovineHD3300000578	0	0	2	1
0	BovineHD3300000579	0	0	2	1
0	BovineHD3300000580	0	0	0	2
0	BovineHD3300000582	0	0	2	1
0	BovineHD3300000583	0	0	2	1
0	BovineHD3300000584	0	0	0	1
0	BovineHD3300000585	0	0	2	1
0	BovineHD3300000586	0	0	2	1
0	BovineHD3300000587	0	0	1	2
0	BovineHD3300000588	0	0	1	2
0	BovineHD3300000589	0	0	1	2
0	BovineHD3300000590	0	0	1	2
0	BovineHD3300000591	0	0	1	2
0	BovineHD3300000592	0	0	2	1
0	BovineHD3300000593	0	0	2	1
0	BovineHD3300000594	0	0	2	1
0	BovineHD3300000595	0	0	2	1
0	BovineHD3300000596	0	0	1	2
0	BovineHD3300000597	0	0	0	2
0	BovineHD3300000598	0	0	0	2
0	BovineHD3300000599	0	0	1	2
0	BovineHD3300000600	0	0	1	2
0	BovineHD3300000601	0	0	2	1
0	BovineHD3300000602	0	0	1	2
0	BovineHD3300000603	0	0	0	1
0	BovineHD3300000604	0	0	2	1
0	BovineHD3300000605	0	0	2	1
0	BovineHD3300000606	0	0	1	2
0	BovineHD3300000608	0	0	2	1
0	BovineHD3300000609	0	0	1	2
0	BovineHD3300000610	0	0	1	2
0	BovineHD3300000611	0	0	2	1
0	BovineHD3300000612	0	0	1	2
0	BovineHD3300000613	0	0	1	2
0	BovineHD3300000614	0	0	0	2
0	BovineHD3300000615	0	0	2	1
0	BovineHD3300000616	0	0	0	2
0	BovineHD3300000617	0	0	2	1
0	BovineHD3300000618	0	0	2	1
0	BovineHD3300000619	0	0	2	1
0	BovineHD3300000620	0	0	2	1
0	BovineHD3300000621	0	0	2	1
0	BovineHD3300000622	0	0	2	1
0	BovineHD3300000623	0	0	1	2
0	BovineHD3300000624	0	0	0	2
0	BovineHD3300000625	0	0	2	1
0	BovineHD3300000626	0	0	2	1
0	BovineHD3300000627	0	0	2	1
0	BovineHD3300000628	0	0	0	1
0	BovineHD3300000629	0	0	1	2
0	BovineHD3300000630	0	0	1	2
0	BovineHD3300000631	0	0	2	1
0	BovineHD3300000632	0	0	1	2
0	BovineHD3300000633	0	0	0	1
0	BovineHD3300000634	0	0	0	1
0	BovineHD3300000636	0	0	1	2
0	BovineHD3300000637	0	0	1	2
0	BovineHD3300000638	0	0	1	2
0	BovineHD3300000639	0	0	2	1
0	BovineHD3300000640	0	0	2	1
0	BovineHD3300000641	0	0	1	2
0	BovineHD3300000642	0	0	2	1
0	BovineHD3300000643	0	0	2	1
0	BovineHD3300000644	0	0	2	1
0	BovineHD3300000646	0	0	2	1
0	BovineHD3300000647	0	0	0	1
0	BovineHD3300000648	0	0	0	2
0	BovineHD3300000649	0	0	0	1
0	BovineHD3300000650	0	0	2	1
0	BovineHD3300000651	0	0	1	2
0	BovineHD3300000652	0	0	1	2
0	BovineHD3300000653	0	0	2	1
0	BovineHD3300000654	0	0	0	1
0	BovineHD3300000655	0	0	1	2
0	BovineHD3300000656	0	0	1	2
0	BovineHD3300000657	0	0	2	1
0	BovineHD3300000658	0	0	1	2
0	BovineHD3300000659	0	0	0	2
0	BovineHD3300000660	0	0	2	1
0	BovineHD3300000661	0	0	0	2
0	BovineHD3300000662	0	0	2	1
0	BovineHD3300000663	0	0	2	1
0	BovineHD3300000664	0	0	1	2
0	BovineHD3300000665	0	0	1	2
0	BovineHD3300000666	0	0	1	2
0	BovineHD3300000667	0	0	2	1
0	BovineHD3300000668	0	0	2	1
0	BovineHD3300000669	0	0	1	2
0	BovineHD3300000670	0	0	2	1
0	BovineHD3300000671	0	0	1	2
0	BovineHD3300000672	0	0	1	2
0	BovineHD3300000673	0	0	2	1
0	BovineHD3300000674	0	0	1	2
0	BovineHD3300000675	0	0	0	2
0	BovineHD3300000676	0	0	2	1
0	BovineHD3300000677	0	0	0	2
0	BovineHD3300000679	0	0	1	2
0	BovineHD3300000680	0	0	2	1
0	BovineHD3300000681	0	0	1	2
0	BovineHD3300000682	0	0	1	2
0	BovineHD3300000683	0	0	1	2
0	BovineHD3300000684	0	0	1	2
0	BovineHD3300000685	0	0	0	2
0	BovineHD3300000686	0	0	1	2
0	BovineHD3300000687	0	0	2	1
0	BovineHD3300000688	0	0	1	2
0	BovineHD3300000689	0	0	1	2
0	BovineHD3300000690	0	0	0	2
0	BovineHD3300000691	0	0	2	1
0	BovineHD3300000692	0	0	2	1
0	BovineHD3300000693	0	0	0	2
0	BovineHD3300000694	0	0	1	2
0	BovineHD3300000699	0	0	0	1
0	BovineHD3300000700	0	0	0	1
0	BovineHD3300000701	0	0	1	2
0	BovineHD3300000702	0	0	1	2
0	BovineHD3300000704	0	0	0	2
0	BovineHD3300000706	0	0	1	2
0	BovineHD3300000707	0	0	0	2
0	BovineHD3300000709	0	0	2	1
0	BovineHD3300000710	0	0	0	2
0	BovineHD3300000711	0	0	0	2
0	BovineHD3300000714	0	0	0	2
0	BovineHD3300000715	0	0	0	1
0	BovineHD3300000716	0	0	2	1
0	BovineHD3300000717	0	0	2	1
0	BovineHD3300000718	0	0	2	1
0	BovineHD3300000719	0	0	2	1
0	BovineHD3300000720	0	0	2	1
0	BovineHD3300000722	0	0	1	2
0	BovineHD3300000723	0	0	2	1
0	BovineHD3300000724	0	0	2	1
0	BovineHD3300000725	0	0	1	2
0	BovineHD3300000726	0	0	2	1
0	BovineHD3300000728	0	0	0	2
0	BovineHD3300000731	0	0	2	1
0	BovineHD3300000732	0	0	0	2
0	BovineHD3300000733	0	0	0	2
0	BovineHD3300000734	0	0	0	1
0	BovineHD3300000735	0	0	1	2
0	BovineHD3300000747	0	0	0	2
0	BovineHD3300000750	0	0	2	1
0	BovineHD3300000751	0	0	2	1
0	BovineHD3300000754	0	0	2	1
0	BovineHD3300000755	0	0	2	1
0	BovineHD3300000757	0	0	0	1
0	BovineHD3300000758	0	0	1	2
0	BovineHD3300000759	0	0	2	1
0	BovineHD3300000764	0	0	0	1
0	BovineHD3300000770	0	0	0	2
0	BovineHD3300000771	0	0	0	1
0	BovineHD3300000772	0	0	1	2
0	BovineHD3300000775	0	0	2	1
0	BovineHD3300000776	0	0	0	2
0	BovineHD3300000778	0	0	0	2
0	BovineHD3300000780	0	0	1	2
0	BovineHD3300000781	0	0	2	1
0	BovineHD3300000782	0	0	2	1
0	BovineHD3300000783	0	0	0	2
0	BovineHD3300000784	0	0	2	1
0	BovineHD3300000785	0	0	2	1
0	BovineHD3300000786	0	0	2	1
0	BovineHD3300000787	0	0	1	2
0	BovineHD3300000788	0	0	1	2
0	BovineHD3300000789	0	0	2	1
0	BovineHD3300000790	0	0	2	1
0	BovineHD3300000794	0	0	2	1
0	BovineHD3300000795	0	0	0	2
0	BovineHD3300000796	0	0	0	2
0	BovineHD3300000798	0	0	0	2
0	BovineHD3300000804	0	0	0	2
0	BovineHD3300000806	0	0	0	1
0	BovineHD3300000807	0	0	1	2
0	BovineHD3300000810	0	0	0	2
0	BovineHD3300000811	0	0	0	1
0	BovineHD3300000812	0	0	0	2
0	BovineHD3300000813	0	0	0	1
0	BovineHD3300000814	0	0	2	1
0	BovineHD3300000819	0	0	0	2
0	BovineHD3300000822	0	0	1	2
0	BovineHD3300000823	0	0	0	1
0	BovineHD3300000824	0	0	2	1
0	BovineHD3300000825	0	0	1	2
0	BovineHD3300000828	0	0	0	2
0	BovineHD3300000829	0	0	0	2
0	BovineHD3300000830	0	0	0	2
0	BovineHD3300000832	0	0	1	2
0	BovineHD3300000835	0	0	2	1
0	BovineHD3300000836	0	0	2	1
0	BovineHD3300000837	0	0	1	2
0	BovineHD3300000842	0	0	1	2
0	BovineHD3300000849	0	0	0	2
0	BovineHD3300000851	0	0	0	2
0	BovineHD3300000854	0	0	0	2
0	BovineHD3300000856	0	0	0	2
0	BovineHD3300000857	0	0	0	2
0	BovineHD3300000860	0	0	0	2
0	BovineHD3300000862	0	0	0	1
0	BovineHD3300000865	0	0	0	1
0	BovineHD3300000868	0	0	1	2
0	BovineHD3300000870	0	0	1	2
0	BovineHD3300000871	0	0	1	2
0	BovineHD3300000872	0	0	1	2
0	BovineHD3300000873	0	0	2	1
0	BovineHD3300000874	0	0	2	1
0	BovineHD3300000875	0	0	2	1
0	BovineHD3300000876	0	0	0	2
0	BovineHD3300000882	0	0	0	2
0	BovineHD3300000886	0	0	2	1
0	BovineHD3300000887	0	0	2	1
0	BovineHD3300000889	0	0	0	2
0	BovineHD3300000890	0	0	0	1
0	BovineHD3300000891	0	0	1	2
0	BovineHD3300000892	0	0	2	1
0	BovineHD3300000893	0	0	0	2
0	BovineHD3300000896	0	0	1	2
0	BovineHD3300000900	0	0	2	1
0	BovineHD3300000901	0	0	0	1
0	BovineHD3300000902	0	0	0	1
0	BovineHD3300000904	0	0	2	1
0	BovineHD3300000905	0	0	1	2
0	BovineHD3300000906	0	0	0	1
0	BovineHD3300000907	0	0	2	1
0	BovineHD3300000908	0	0	2	1
0	BovineHD3300000909	0	0	1	2
0	BovineHD3300000910	0	0	1	2
0	BovineHD3300000912	0	0	0	1
0	BovineHD3300000915	0	0	1	2
0	BovineHD3300000918	0	0	0	1
0	BovineHD3300000919	0	0	2	1
0	BovineHD3300000920	0	0	2	1
0	BovineHD3300000922	0	0	1	2
0	BovineHD3300000928	0	0	2	1
0	BovineHD3300000932	0	0	0	2
0	BovineHD3300000935	0	0	0	2
0	BovineHD3300000937	0	0	2	1
0	BovineHD3300000939	0	0	1	2
0	BovineHD3300000940	0	0	2	1
0	BovineHD3300000941	0	0	2	1
0	BovineHD3300000942	0	0	2	1
0	BovineHD3300000943	0	0	0	1
0	BovineHD3300000944	0	0	1	2
0	BovineHD3300000945	0	0	1	2
0	BovineHD3300000946	0	0	2	1
0	BovineHD3300000947	0	0	2	1
0	BovineHD3300000948	0	0	1	2
0	BovineHD3300000949	0	0	1	2
0	BovineHD3300000950	0	0	2	1
0	BovineHD3300000955	0	0	0	2
0	BovineHD3300000961	0	0	0	2
0	BovineHD3300000962	0	0	2	1
0	BovineHD3300000964	0	0	0	1
0	BovineHD3300000965	0	0	1	2
0	BovineHD3300000966	0	0	0	2
0	BovineHD3300000967	0	0	2	1
0	BovineHD3300000972	0	0	2	1
0	BovineHD3300000973	0	0	1	2
0	BovineHD3300000974	0	0	1	2
0	BovineHD3300000975	0	0	1	2
0	BovineHD3300000976	0	0	2	1
0	BovineHD3300000977	0	0	0	2
0	BovineHD3300000978	0	0	2	1
0	BovineHD3300000979	0	0	0	2
0	BovineHD3300000980	0	0	2	1
0	BovineHD3300000981	0	0	2	1
0	BovineHD3300000982	0	0	2	1
0	BovineHD3300000983	0	0	2	1
0	BovineHD3300000984	0	0	2	1
0	BovineHD3300000985	0	0	1	2
0	BovineHD3300000986	0	0	1	2
0	BovineHD3300000987	0	0	1	2
0	BovineHD3300000988	0	0	1	2
0	BovineHD3300000989	0	0	1	2
0	BovineHD3300000990	0	0	2	1
0	BovineHD3300000992	0	0	0	2
0	BovineHD3300000993	0	0	2	1
0	BovineHD3300000994	0	0	2	1
0	BovineHD3300000995	0	0	0	1
0	BovineHD3300000996	0	0	1	2
0	BovineHD3300000997	0	0	1	2
0	BovineHD3300000998	0	0	2	1
0	BovineHD3300001004	0	0	0	1
0	BovineHD3300001005	0	0	0	1
0	BovineHD3300001006	0	0	0	1
0	BovineHD3300001007	0	0	1	2
0	BovineHD3300001017	0	0	1	2
0	BovineHD3300001018	0	0	2	1
0	BovineHD3300001019	0	0	2	1
0	BovineHD3300001020	0	0	1	2
0	BovineHD3300001022	0	0	1	2
0	BovineHD3300001031	0	0	2	1
0	BovineHD3300001032	0	0	0	2
0	BovineHD3300001033	0	0	2	1
0	BovineHD3300001034	0	0	1	2
0	BovineHD3300001035	0	0	1	2
0	BovineHD3300001037	0	0	2	1
0	BovineHD3300001040	0	0	1	2
0	BovineHD3300001041	0	0	2	1
0	BovineHD3300001042	0	0	1	2
0	BovineHD3300001043	0	0	0	2
0	BovineHD3300001045	0	0	0	1
0	BovineHD3300001046	0	0	0	1
0	BovineHD3300001050	0	0	1	2
0	BovineHD3300001051	0	0	1	2
0	BovineHD3300001052	0	0	1	2
0	BovineHD3300001053	0	0	1	2
0	BovineHD3300001054	0	0	2	1
0	BovineHD3300001055	0	0	0	2
0	BovineHD3300001056	0	0	1	2
0	BovineHD3300001057	0	0	1	2
0	BovineHD3300001058	0	0	2	1
0	BovineHD3300001059	0	0	0	2
0	BovineHD3300001060	0	0	2	1
0	BovineHD3300001061	0	0	1	2
0	BovineHD3300001062	0	0	1	2
0	BovineHD3300001063	0	0	2	1
0	BovineHD3300001064	0	0	1	2
0	BovineHD3300001065	0	0	2	1
0	BovineHD3300001066	0	0	1	2
0	BovineHD3300001067	0	0	2	1
0	BovineHD3300001068	0	0	1	2
0	BovineHD3300001069	0	0	1	2
0	BovineHD3300001070	0	0	2	1
0	BovineHD3300001073	0	0	0	2
0	BovineHD3300001075	0	0	0	1
0	BovineHD3300001076	0	0	0	2
0	BovineHD3300001077	0	0	1	2
0	BovineHD3300001078	0	0	1	2
0	BovineHD3300001081	0	0	1	2
0	BovineHD3300001082	0	0	1	2
0	BovineHD3300001084	0	0	0	1
0	BovineHD3300001087	0	0	1	2
0	BovineHD3300001088	0	0	1	2
0	BovineHD3300001089	0	0	2	1
0	BovineHD3300001091	0	0	0	1
0	BovineHD3300001093	0	0	0	2
0	BovineHD3300001094	0	0	2	1
0	BovineHD3300001095	0	0	1	2
0	BovineHD3300001096	0	0	2	1
0	BovineHD3300001097	0	0	2	1
0	BovineHD3300001098	0	0	0	2
0	BovineHD3300001099	0	0	2	1
0	BovineHD3300001100	0	0	0	1
0	BovineHD3300001101	0	0	1	2
0	BovineHD3300001102	0	0	0	1
0	BovineHD3300001103	0	0	2	1
0	BovineHD3300001104	0	0	2	1
0	BovineHD3300001105	0	0	2	1
0	BovineHD3300001106	0	0	0	1
0	BovineHD3300001107	0	0	2	1
0	BovineHD3300001108	0	0	2	1
0	BovineHD3300001109	0	0	0	1
0	BovineHD3300001110	0	0	1	2
0	BovineHD3300001111	0	0	0	1
0	BovineHD3300001112	0	0	2	1
0	BovineHD3300001113	0	0	2	1
0	BovineHD3300001115	0	0	2	1
0	BovineHD3300001116	0	0	2	1
0	BovineHD3300001117	0	0	0	1
0	BovineHD3300001118	0	0	2	1
0	BovineHD3300001119	0	0	2	1
0	BovineHD3300001120	0	0	2	1
0	BovineHD3300001121	0	0	2	1
0	BovineHD3300001122	0	0	1	2
0	BovineHD3300001123	0	0	1	2
0	BovineHD3300001128	0	0	0	1
0	BovineHD3300001130	0	0	1	2
0	BovineHD3300001131	0	0	1	2
0	BovineHD3300001132	0	0	2	1
0	BovineHD3300001133	0	0	0	1
0	BovineHD3300001137	0	0	0	1
0	BovineHD3300001138	0	0	0	1
0	BovineHD3300001141	0	0	1	2
0	BovineHD3300001145	0	0	0	1
0	BovineHD3300001146	0	0	1	2
0	BovineHD3300001147	0	0	2	1
0	BovineHD3300001148	0	0	2	1
0	BovineHD3300001150	0	0	1	2
0	BovineHD3300001151	0	0	2	1
0	BovineHD3300001152	0	0	2	1
0	BovineHD3300001153	0	0	2	1
0	BovineHD3300001155	0	0	0	2
0	BovineHD3300001156	0	0	2	1
0	BovineHD3300001157	0	0	2	1
0	BovineHD3300001158	0	0	0	1
0	BovineHD3300001159	0	0	0	1
0	BovineHD3300001160	0	0	2	1
0	BovineHD3300001161	0	0	1	2
0	BovineHD3300001162	0	0	1	2
0	BovineHD3300001163	0	0	1	2
0	BovineHD3300001164	0	0	0	2
0	BovineHD3300001166	0	0	0	2
0	BovineHD3300001167	0	0	0	1
0	BovineHD3300001168	0	0	0	1
0	BovineHD3300001170	0	0	0	2
0	BovineHD3300001172	0	0	0	1
0	BovineHD3300001174	0	0	1	2
0	BovineHD3300001175	0	0	0	2
0	BovineHD3300001176	0	0	2	1
0	BovineHD3300001178	0	0	1	2
0	BovineHD3300001179	0	0	0	2
0	BovineHD3300001181	0	0	0	1
0	BovineHD3300001182	0	0	0	1
0	BovineHD3300001183	0	0	0	1
0	BovineHD3300001184	0	0	2	1
0	BovineHD3300001185	0	0	1	2
0	BovineHD3300001186	0	0	1	2
0	BovineHD3300001187	0	0	0	2
0	BovineHD3300001188	0	0	0	2
0	BovineHD3300001189	0	0	0	2
0	BovineHD3300001190	0	0	0	2
0	BovineHD3300001192	0	0	0	1
0	BovineHD3300001193	0	0	0	2
0	BovineHD3300001194	0	0	0	2
0	BovineHD3300001195	0	0	0	1
0	BovineHD3300001196	0	0	2	1
0	BovineHD3300001197	0	0	2	1
0	BovineHD3300001198	0	0	0	1
0	BovineHD3300001199	0	0	2	1
0	BovineHD3300001200	0	0	1	2
0	BovineHD3300001201	0	0	2	1
0	BovineHD3300001202	0	0	0	1
0	BovineHD3300001203	0	0	2	1
0	BovineHD3300001205	0	0	0	1
0	BovineHD3300001207	0	0	2	1
0	BovineHD3300001209	0	0	1	2
0	BovineHD3300001210	0	0	2	1
0	BovineHD3300001214	0	0	2	1
0	BovineHD3300001215	0	0	1	2
0	BovineHD3300001216	0	0	2	1
0	BovineHD3300001217	0	0	0	1
0	BovineHD3300001218	0	0	2	1
0	BovineHD3300001219	0	0	2	1
0	BovineHD3300001220	0	0	2	1
0	BovineHD3300001221	0	0	0	1
0	BovineHD3300001225	0	0	0	1
0	BovineHD3300001226	0	0	2	1
0	BovineHD3300001227	0	0	2	1
0	BovineHD3300001228	0	0	2	1
0	BovineHD3300001229	0	0	2	1
0	BovineHD3300001230	0	0	1	2
0	BovineHD3300001231	0	0	0	1
0	BovineHD3300001232	0	0	2	1
0	BovineHD3300001237	0	0	0	2
0	BovineHD3300001243	0	0	1	2
0	BovineHD3300001244	0	0	2	1
0	BovineHD3300001245	0	0	0	1
0	BovineHD3300001246	0	0	1	2
0	BovineHD3300001248	0	0	0	1
0	BovineHD3300001249	0	0	2	1
0	BovineHD3300001250	0	0	1	2
0	BovineHD3300001253	0	0	2	1
0	BovineHD3300001254	0	0	2	1
0	BovineHD3300001255	0	0	2	1
0	BovineHD3300001256	0	0	2	1
0	BovineHD3300001257	0	0	0	2
0	BovineHD3300001260	0	0	0	1
0	BovineHD3300001261	0	0	0	2
0	BovineHD3300001262	0	0	1	2
0	BovineHD3300001263	0	0	2	1
0	BovineHD3300001264	0	0	0	2
0	BovineHD3300001266	0	0	2	1
0	BovineHD3300001271	0	0	0	1
0	BovineHD3300001272	0	0	2	1
0	BovineHD3300001273	0	0	1	2
0	BovineHD3300001274	0	0	0	2
0	BovineHD3300001275	0	0	2	1
0	BovineHD3300001276	0	0	2	1
0	BovineHD3300001277	0	0	1	2
0	BovineHD3300001278	0	0	2	1
0	BovineHD3300001279	0	0	1	2
0	BovineHD3300001280	0	0	1	2
0	BovineHD3300001281	0	0	0	1
0	BovineHD3300001282	0	0	2	1
0	BovineHD3300001284	0	0	2	1
0	BovineHD3300001285	0	0	2	1
0	BovineHD3300001286	0	0	2	1
0	BovineHD3300001287	0	0	2	1
0	BovineHD3300001288	0	0	1	2
0	BovineHD3300001290	0	0	1	2
0	BovineHD3300001291	0	0	2	1
0	BovineHD3300001292	0	0	1	2
0	BovineHD3300001293	0	0	2	1
0	BovineHD3300001294	0	0	1	2
0	BovineHD3300001298	0	0	0	1
0	BovineHD3300001300	0	0	1	2
0	BovineHD3300001301	0	0	0	1
0	BovineHD3300001302	0	0	1	2
0	BovineHD3300001303	0	0	1	2
0	BovineHD3300001304	0	0	0	2
0	BovineHD3300001305	0	0	2	1
0	BovineHD3300001306	0	0	2	1
0	BovineHD3300001307	0	0	2	1
0	BovineHD3300001308	0	0	1	2
0	BovineHD3300001309	0	0	1	2
0	BovineHD3300001312	0	0	0	1
0	BovineHD3300001320	0	0	0	2
0	BovineHD3300001327	0	0	0	1
0	BovineHD3300001330	0	0	1	2
0	BovineHD3300001334	0	0	1	2
0	BovineHD3300001335	0	0	2	1
0	BovineHD3300001339	0	0	0	2
0	BovineHD3300001340	0	0	0	1
0	BovineHD3300001341	0	0	2	1
0	BovineHD3300001342	0	0	1	2
0	BovineHD3300001343	0	0	2	1
0	BovineHD3300001344	0	0	0	2
0	BovineHD3300001345	0	0	1	2
0	BovineHD3300001346	0	0	1	2
0	BovineHD3300001347	0	0	1	2
0	BovineHD3300001348	0	0	1	2
0	BovineHD3300001349	0	0	1	2
0	BovineHD3300001350	0	0	0	1
0	BovineHD3300001351	0	0	1	2
0	BovineHD3300001352	0	0	0	1
0	BovineHD3300001354	0	0	1	2
0	BovineHD3300001355	0	0	0	2
0	BovineHD3300001357	0	0	0	2
0	BovineHD3300001358	0	0	2	1
0	BovineHD3300001359	0	0	1	2
0	BovineHD3300001360	0	0	2	1
0	BovineHD3300001362	0	0	1	2
0	BovineHD3300001363	0	0	2	1
0	BovineHD3300001366	0	0	2	1
0	BovineHD3300001367	0	0	0	2
0	BovineHD3300001370	0	0	1	2
0	BovineHD3300001372	0	0	2	1
0	BovineHD3300001373	0	0	2	1
0	BovineHD3300001374	0	0	0	2
0	BovineHD3300001375	0	0	1	2
0	BovineHD3300001376	0	0	2	1
0	BovineHD3300001377	0	0	1	2
0	BovineHD3300001379	0	0	1	2
0	BovineHD3300001382	0	0	2	1
0	BovineHD3300001383	0	0	2	1
0	BovineHD3300001384	0	0	0	1
0	BovineHD3300001387	0	0	2	1
0	BovineHD3300001389	0	0	1	2
0	BovineHD3300001391	0	0	2	1
0	BovineHD3300001392	0	0	1	2
0	BovineHD3300001393	0	0	2	1
0	BovineHD3300001394	0	0	2	1
0	BovineHD3300001395	0	0	1	2
0	BovineHD3300001396	0	0	1	2
0	BovineHD3300001397	0	0	1	2
0	BovineHD3300001398	0	0	1	2
0	BovineHD3300001399	0	0	2	1
0	BovineHD3300001402	0	0	1	2
0	BovineHD3300001403	0	0	1	2
0	BovineHD3300001404	0	0	1	2
0	BovineHD3300001405	0	0	2	1
0	BovineHD3300001406	0	0	2	1
0	BovineHD3300001407	0	0	1	2
0	BovineHD3300001409	0	0	2	1
0	BovineHD3300001410	0	0	1	2
0	BovineHD3300001411	0	0	2	1
0	BovineHD3300001412	0	0	2	1
0	BovineHD3300001413	0	0	2	1
0	BovineHD3300001414	0	0	2	1
0	BovineHD3300001415	0	0	0	2
0	BovineHD3300001417	0	0	2	1
0	BovineHD3300001418	0	0	2	1
0	BovineHD3300001419	0	0	2	1
0	BovineHD3300001421	0	0	0	1
0	BovineHD3300001422	0	0	1	2
0	BovineHD3300001423	0	0	2	1
0	BovineHD3300001424	0	0	2	1
0	BovineHD3300001425	0	0	2	1
0	BovineHD3300001426	0	0	2	1
0	BovineHD3300001427	0	0	2	1
0	BovineHD3300001428	0	0	2	1
0	BovineHD3300001429	0	0	1	2
0	BovineHD3300001430	0	0	2	1
0	BovineHD3300001431	0	0	2	1
0	BovineHD3300001432	0	0	2	1
0	BovineHD3300001433	0	0	2	1
0	BovineHD3300001434	0	0	2	1
0	BovineHD3300001435	0	0	2	1
0	BovineHD3300001436	0	0	2	1
0	BovineHD3300001437	0	0	2	1
0	BovineHD3300001438	0	0	2	1
0	BovineHD3300001444	0	0	2	1
0	BovineHD3300001445	0	0	1	2
0	BovineHD3300001446	0	0	0	2
0	BovineHD3300001447	0	0	1	2
0	BovineHD3300001448	0	0	2	1
0	BovineHD3300001449	0	0	2	1
0	BovineHD3300001450	0	0	2	1
0	BovineHD3300001451	0	0	2	1
0	BovineHD3300001452	0	0	1	2
0	BovineHD3300001453	0	0	2	1
0	BovineHD3300001454	0	0	2	1
0	BovineHD3300001456	0	0	1	2
0	BovineHD3300001457	0	0	0	1
0	BovineHD3300001459	0	0	0	1
0	BovineHD3300001460	0	0	2	1
0	BovineHD3300001462	0	0	2	1
0	BovineHD3300001463	0	0	0	1
0	BovineHD3300001464	0	0	0	2
0	BovineHD3300001465	0	0	0	2
0	BovineHD3300001466	0	0	1	2
0	BovineHD3300001467	0	0	2	1
0	BovineHD3300001468	0	0	2	1
0	BovineHD3300001469	0	0	0	1
0	BovineHD3300001470	0	0	2	1
0	BovineHD3300001471	0	0	0	1
0	BovineHD3300001473	0	0	1	2
0	BovineHD3300001475	0	0	2	1
0	BovineHD3300001479	0	0	0	2
0	BovineHD3300001480	0	0	2	1
0	BovineHD3300001481	0	0	2	1
0	BovineHD3300001482	0	0	2	1
0	BovineHD3300001484	0	0	2	1
0	BovineHD3300001485	0	0	2	1
0	BovineHD3300001486	0	0	2	1
0	BovineHD3300001487	0	0	2	1
0	BovineHD3300001488	0	0	1	2
0	BovineHD3300001489	0	0	1	2
0	BovineHD3300001490	0	0	2	1
0	BovineHD3300001491	0	0	2	1
0	BovineHD3300001492	0	0	1	2
0	BovineHD3300001493	0	0	2	1
0	BovineHD3300001494	0	0	1	2
0	BovineHD3300001496	0	0	1	2
0	BovineHD3300001497	0	0	2	1
0	BovineHD3300001498	0	0	2	1
0	BovineHD3300001499	0	0	2	1
0	BovineHD3300001501	0	0	2	1
0	BovineHD3300001502	0	0	2	1
0	BovineHD3300001503	0	0	1	2
0	BovineHD3300001504	0	0	2	1
0	BovineHD3300001505	0	0	2	1
0	BovineHD3300001506	0	0	1	2
0	BovineHD3300001507	0	0	2	1
0	BovineHD3300001508	0	0	1	2
0	BovineHD3300001509	0	0	1	2
0	BovineHD3300001510	0	0	1	2
0	BovineHD3300001511	0	0	1	2
0	BovineHD3300001512	0	0	2	1
0	BovineHD3300001513	0	0	1	2
0	BovineHD3300001514	0	0	1	2
0	BovineHD3300001519	0	0	1	2
0	BovineHD3300001520	0	0	2	1
0	BovineHD3300001522	0	0	2	1
0	BovineHD3300001523	0	0	2	1
0	BovineHD3300001527	0	0	2	1
0	BovineHD3300001528	0	0	0	1
0	BovineHD3300001537	0	0	0	2
0	BovineHD3300001542	0	0	0	2
0	BovineHD3300001552	0	0	2	1
0	BovineHD3300001555	0	0	0	2
0	BovineHD3300001564	0	0	1	2
0	BovineHD3300001565	0	0	2	1
0	BovineHD3300001566	0	0	1	2
0	BovineHD3300001572	0	0	2	1
0	BovineHD3300001573	0	0	0	1
0	BovineHD3300001575	0	0	2	1
0	BovineHD3300001577	0	0	2	1
0	BovineHD3300001578	0	0	2	1
0	BovineHD3300001580	0	0	1	2
0	BovineHD3300001581	0	0	2	1
0	BovineHD3300001582	0	0	1	2
0	BovineHD3300001583	0	0	2	1
0	BovineHD3300001584	0	0	2	1
0	BovineHD3300001585	0	0	0	2
0	BovineHD3300001586	0	0	1	2
0	BovineHD3300001587	0	0	1	2
0	BovineHD3300001588	0	0	2	1
0	BovineHD3300001589	0	0	2	1
0	BovineHD3300001590	0	0	2	1
0	BovineHD3300001591	0	0	0	1
0	BovineHD3300001592	0	0	1	2
0	BovineHD3300001593	0	0	1	2
0	BovineHD3300001594	0	0	1	2
0	BovineHD3300001596	0	0	1	2
0	BovineHD3300001597	0	0	2	1
0	BovineHD3300001598	0	0	2	1
0	BovineHD3300001599	0	0	0	2
0	BovineHD3300001600	0	0	1	2
0	BovineHD3300001605	0	0	1	2
0	BovineHD3300001606	0	0	1	2
0	BovineHD3300001607	0	0	1	2
0	BovineHD3300001608	0	0	1	2
0	BovineHD3300001609	0	0	1	2
0	BovineHD3300001617	0	0	1	2
0	BovineHD3300001618	0	0	2	1
0	BovineHD3300001621	0	0	2	1
0	BovineHD3300001624	0	0	1	2
0	BovineHD3300001629	0	0	2	1
0	BovineHD3300001630	0	0	1	2
0	BovineHD3300001631	0	0	0	1
0	BovineHD3300001633	0	0	0	1
0	BovineHD3300001634	0	0	0	2
0	BovineHD3300001635	0	0	0	1
0	BovineHD3300001636	0	0	0	1
0	BovineHD3300001642	0	0	1	2
0	BovineHD3300001643	0	0	1	2
0	BovineHD3300001644	0	0	1	2
0	BovineHD3300001645	0	0	1	2
0	BovineHD3300001649	0	0	2	1
0	BovineHD3300001657	0	0	1	2
0	BovineHD3300001659	0	0	0	1
0	BovineHD3300001660	0	0	0	1
0	BovineHD3300001661	0	0	0	2
0	BovineHD3300001662	0	0	2	1
0	BovineHD3300001663	0	0	1	2
0	BovineHD3300001664	0	0	0	2
0	BovineHD3300001672	0	0	0	2
0	BovineHD3300001673	0	0	2	1
0	BovineHD3300001681	0	0	1	2
0	BovineHD3300001682	0	0	1	2
0	BovineHD3300001683	0	0	1	2
0	BovineHD3300001684	0	0	0	2
0	BovineHD3300001685	0	0	2	1
0	BovineHD3300001686	0	0	1	2
0	BovineHD3300001687	0	0	2	1
0	BovineHD3300001688	0	0	1	2
0	BovineHD3300001689	0	0	2	1
0	BovineHD3300001690	0	0	1	2
0	BovineHD3300001691	0	0	2	1
0	BovineHD3300001696	0	0	0	2
0	BovineHD4000000001	0	0	1	2
0	BovineHD4000000006	0	0	1	2
0	BovineHD4000000008	0	0	1	2
0	BovineHD4000000009	0	0	1	2
0	BovineHD4000000014	0	0	1	2
0	BovineHD4000000016	0	0	1	2
0	BovineHD4000000019	0	0	1	2
0	BovineHD4000000020	0	0	2	1
0	BovineHD4000000022	0	0	2	1
0	BovineHD4000000023	0	0	1	2
0	BovineHD4000000024	0	0	2	1
0	BovineHD4000000029	0	0	2	1
0	BovineHD4000000030	0	0	2	1
0	BovineHD4000000032	0	0	2	1
0	BovineHD4000000036	0	0	2	1
0	BovineHD4000000037	0	0	1	2
0	BovineHD4000000038	0	0	1	2
0	BovineHD4000000039	0	0	2	1
0	BovineHD4000000042	0	0	1	2
0	BovineHD4000000045	0	0	2	1
0	BovineHD4000000047	0	0	1	2
0	BovineHD4000000049	0	0	2	1
0	BovineHD4000000059	0	0	2	1
0	BovineHD4000000063	0	0	2	1
0	BovineHD4000000073	0	0	2	1
0	BovineHD4000000075	0	0	2	1
0	BovineHD4000000079	0	0	1	2
0	BovineHD4000000084	0	0	1	2
0	BovineHD4000000087	0	0	2	1
0	BovineHD4000000088	0	0	2	1
0	BovineHD4000000089	0	0	2	1
0	BovineHD4000000092	0	0	1	2
0	BovineHD4000000093	0	0	2	1
0	BovineHD4000000094	0	0	2	1
0	BovineHD4000000095	0	0	2	1
0	BovineHD4000000096	0	0	2	1
0	BovineHD4000000097	0	0	1	2
0	BovineHD4000000098	0	0	2	1
0	BovineHD4000000099	0	0	1	2
0	BovineHD4000000105	0	0	2	1
0	BovineHD4000000107	0	0	1	2
0	BovineHD4000000110	0	0	2	1
0	BovineHD4000000114	0	0	2	1
0	BovineHD4000000115	0	0	1	2
0	BovineHD4000000117	0	0	2	1
0	BovineHD4000000119	0	0	2	1
0	BTA-03197-no-rs	0	0	0	2
0	BTA-06080-no-rs	0	0	1	2
0	BTA-101258-no-rs	0	0	2	1
0	BTA-101540-no-rs	0	0	1	2
0	BTA-102583-no-rs	0	0	2	1
0	BTA-104619-no-rs	0	0	2	1
0	BTA-106685-no-rs	0	0	0	2
0	BTA-115777-no-rs	0	0	2	1
0	BTA-117784-no-rs	0	0	1	2
0	BTA-117813-no-rs	0	0	2	1
0	BTA-117964-no-rs	0	0	0	2
0	BTA-119435-no-rs	0	0	1	2
0	BTA-120369-no-rs	0	0	1	2
0	BTA-121421-no-rs	0	0	1	2
0	BTA-121681-no-rs	0	0	1	2
0	BTA-16816-no-rs	0	0	0	2
0	BTA-23530-no-rs	0	0	0	2
0	BTA-26713-no-rs	0	0	1	2
0	BTA-26960-no-rs	0	0	2	1
0	BTA-28875-no-rs	0	0	2	1
0	BTA-30826-no-rs	0	0	0	1
0	BTA-31405-no-rs	0	0	1	2
0	BTA-31846-no-rs	0	0	2	1
0	BTA-36783-no-rs	0	0	1	2
0	BTA-37893-no-rs	0	0	1	2
0	BTA-39955-no-rs	0	0	1	2
0	BTA-40029-no-rs	0	0	2	1
0	BTA-41372-no-rs	0	0	2	1
0	BTA-42786-no-rs	0	0	2	1
0	BTA-43043-no-rs	0	0	1	2
0	BTA-44148-no-rs	0	0	1	2
0	BTA-45032-no-rs	0	0	1	2
0	BTA-45114-no-rs	0	0	0	1
0	BTA-48067-no-rs	0	0	2	1
0	BTA-48412-no-rs	0	0	1	2
0	BTA-50169-no-rs	0	0	2	1
0	BTA-51893-no-rs	0	0	1	2
0	BTA-53161-no-rs	0	0	1	2
0	BTA-53171-no-rs	0	0	1	2
0	BTA-68141-no-rs	0	0	2	1
0	BTA-68593-no-rs	0	0	1	2
0	BTA-69349-no-rs	0	0	2	1
0	BTA-69743-no-rs	0	0	1	2
0	BTA-70972-no-rs	0	0	0	1
0	BTA-72745-no-rs	0	0	1	2
0	BTA-74892-no-rs	0	0	2	1
0	BTA-76907-no-rs	0	0	2	1
0	BTA-77952-no-rs	0	0	2	1
0	BTA-78597-no-rs	0	0	2	1
0	BTA-78846-no-rs	0	0	0	2
0	BTA-79505-no-rs	0	0	1	2
0	BTA-79919-no-rs	0	0	1	2
0	BTA-83001-no-rs	0	0	1	2
0	BTA-84198-no-rs	0	0	2	1
0	BTA-87627-no-rs	0	0	0	2
0	BTA-90640-no-rs	0	0	2	1
0	BTA-91788-no-rs	0	0	1	2
0	BTA-93127-no-rs	0	0	1	2
0	BTA-93459-no-rs	0	0	1	2
0	BTA-94373-no-rs	0	0	2	1
0	BTA-96456-no-rs	0	0	1	2
0	BTA-99285-no-rs	0	0	1	2
0	BTB-00005637	0	0	1	2
0	BTB-00021257	0	0	1	2
0	BTB-00045007	0	0	1	2
0	BTB-00051548	0	0	2	1
0	BTB-00062550	0	0	0	2
0	BTB-00139072	0	0	1	2
0	BTB-00180519	0	0	2	1
0	BTB-00221060	0	0	2	1
0	BTB-00259691	0	0	2	1
0	BTB-00299477	0	0	1	2
0	BTB-00320768	0	0	1	2
0	BTB-00427217	0	0	2	1
0	BTB-00448124	0	0	1	2
0	BTB-00478374	0	0	2	1
0	BTB-00582062	0	0	2	1
0	BTB-00607164	0	0	1	2
0	BTB-00782470	0	0	0	1
0	BTB-00790090	0	0	2	1
0	BTB-00877239	0	0	2	1
0	BTB-00877989	0	0	2	1
0	BTB-00884488	0	0	2	1
0	BTB-00952622	0	0	1	2
0	BTB-00971327	0	0	1	2
0	BTB-01007059	0	0	2	1
0	BTB-01047979	0	0	2	1
0	BTB-01071390	0	0	1	2
0	BTB-01084203	0	0	1	2
0	BTB-01094670	0	0	1	2
0	BTB-01115774	0	0	2	1
0	BTB-01123000	0	0	1	2
0	BTB-01140799	0	0	2	1
0	BTB-01156849	0	0	2	1
0	BTB-01157072	0	0	1	2
0	BTB-01157116	0	0	2	1
0	BTB-01184901	0	0	0	2
0	BTB-01198798	0	0	2	1
0	BTB-01201377	0	0	2	1
0	BTB-01245976	0	0	0	1
0	BTB-01269588	0	0	1	2
0	BTB-01293013	0	0	1	2
0	BTB-01333819	0	0	2	1
0	BTB-01338397	0	0	2	1
0	BTB-01347970	0	0	2	1
0	BTB-01355280	0	0	1	2
0	BTB-01386016	0	0	0	1
0	BTB-01395874	0	0	2	1
0	BTB-01412707	0	0	1	2
0	BTB-01422577	0	0	2	1
0	BTB-01422993	0	0	1	2
0	BTB-01439535	0	0	0	2
0	BTB-01441250	0	0	2	1
0	BTB-01447970	0	0	2	1
0	BTB-01457823	0	0	2	1
0	BTB-01578666	0	0	1	2
0	BTB-01605114	0	0	1	2
0	BTB-01703036	0	0	2	1
0	BTB-01727345	0	0	1	2
0	BTB-01731406	0	0	1	2
0	BTB-01732384	0	0	1	2
0	BTB-01754501	0	0	0	1
0	BTB-01793064	0	0	2	1
0	BTB-01794351	0	0	1	2
0	BTB-01825965	0	0	2	1
0	BTB-01848340	0	0	1	2
0	BTB-01855930	0	0	1	2
0	BTB-01876530	0	0	1	2
0	BTB-01878273	0	0	2	1
0	BTB-01878903	0	0	1	2
0	BTB-01889136	0	0	1	2
0	BTB-01900171	0	0	2	1
0	BTB-01901306	0	0	2	1
0	BTB-01936718	0	0	1	2
0	BTB-01977298	0	0	2	1
0	BTB-01981433	0	0	2	1
0	BTB-01997588	0	0	2	1
0	BTB-02001456	0	0	1	2
0	BTB-02007723	0	0	1	2
0	BTB-02024135	0	0	1	2
0	BTB-02030131	0	0	2	1
0	BTB-02044873	0	0	1	2
0	BTB-02047655	0	0	2	1
0	BTB-02074694	0	0	2	1
0	BTB-02087354	0	0	1	2
0	Hapmap23213-BTA-149475	0	0	2	1
0	Hapmap23944-BTA-148850	0	0	1	2
0	Hapmap24009-BTA-154002	0	0	2	1
0	Hapmap24303-BTA-150103	0	0	0	2
0	Hapmap24656-BTA-132486	0	0	0	2
0	Hapmap24859-BTA-152258	0	0	0	1
0	Hapmap25709-BTC-045137	0	0	2	1
0	Hapmap25752-BTC-064152	0	0	2	1
0	Hapmap26598-BTC-062212	0	0	1	2
0	Hapmap26699-BTA-147881	0	0	2	1
0	Hapmap26706-BTA-149248	0	0	1	2
0	Hapmap26885-BTC-055761	0	0	2	1
0	Hapmap31121-BTA-146191	0	0	1	2
0	Hapmap31805-BTA-154485	0	0	2	1
0	Hapmap32833-BTA-149079	0	0	2	1
0	Hapmap32865-BTA-160282	0	0	0	2
0	Hapmap34569-BES3_Contig278_695	0	0	2	1
0	Hapmap35505-SCAFFOLD140152_16714	0	0	2	1
0	Hapmap35581-SCAFFOLD50571_5477	0	0	2	1
0	Hapmap36314-SCAFFOLD35866_10767	0	0	2	1
0	Hapmap38362-BTA-94562	0	0	2	1
0	Hapmap38636-BTA-85817	0	0	2	1
0	Hapmap39261-BTA-29176	0	0	1	2
0	Hapmap39330-BTA-42256	0	0	2	1
0	Hapmap39460-BTA-109014	0	0	2	1
0	Hapmap39620-BTA-113785	0	0	1	2
0	Hapmap39761-BTA-56365	0	0	1	2
0	Hapmap40288-BTA-53901	0	0	2	1
0	Hapmap42014-BTA-96005	0	0	0	1
0	Hapmap43001-BTA-63377	0	0	1	2
0	Hapmap43039-BTA-76358	0	0	2	1
0	Hapmap43061-BTA-81117	0	0	1	2
0	Hapmap43206-BTA-22232	0	0	2	1
0	Hapmap43646-BTA-66397	0	0	2	1
0	Hapmap43827-BTA-28415	0	0	1	2
0	Hapmap44214-BTA-15727	0	0	1	2
0	Hapmap44335-BTA-106037	0	0	1	2
0	Hapmap46956-BTA-122667	0	0	2	1
0	Hapmap47397-BTA-74925	0	0	2	1
0	Hapmap47554-BTA-26517	0	0	1	2
0	Hapmap48787-BTA-49360	0	0	1	2
0	Hapmap48868-BTA-71461	0	0	1	2
0	Hapmap48888-BTA-77296	0	0	1	2
0	Hapmap50054-BTA-61605	0	0	2	1
0	Hapmap50150-BTA-90793	0	0	2	1
0	Hapmap51328-BTA-85326	0	0	2	1
0	Hapmap51485-BTA-71438	0	0	2	1
0	Hapmap51925-BTA-94320	0	0	2	1
0	Hapmap52254-rs29014412	0	0	2	1
0	Hapmap53194-rs29011154	0	0	2	1
0	Hapmap53597-rs29010787	0	0	1	2
0	Hapmap54219-rs29017006	0	0	2	1
0	Hapmap57119-rs29009973	0	0	1	2
0	Hapmap58838-rs29018758	0	0	2	1
0	Hapmap59169-rs29012644	0	0	1	2
0	Hapmap60647-rs29027341	0	0	2	1
0	Hapmap60744-rs29013916	0	0	1	2
0	Hapmap60778-rs29021716	0	0	2	1
0	Hapmap61117-rs29023044	0	0	1	2
0	INRA-185	0	0	0	1
0	INRA-186	0	0	0	1
0	INRA-192	0	0	2	1
0	INRA-198	0	0	2	1
0	INRA-202	0	0	2	1
0	INRA-214	0	0	0	1
0	INRA-278	0	0	0	1
0	INRA-301	0	0	2	1
0	INRA-331	0	0	1	2
0	INRA-338	0	0	2	1
0	INRA-351	0	0	2	1
0	INRA-357	0	0	1	2
0	INRA-383	0	0	0	2
0	INRA-396	0	0	0	1
0	INRA-402	0	0	0	1
0	INRA-443	0	0	2	1
0	INRA-459	0	0	2	1
0	INRA-615	0	0	1	2
0	INRA-670	0	0	1	2
0	INRA-681	0	0	1	2
0	INRA-695	0	0	0	1
0	INRA-696	0	0	1	2
0	UA-IFASA-2402	0	0	2	1
0	UA-IFASA-5862	0	0	1	2
0	UA-IFASA-6924	0	0	0	1
0	UA-IFASA-6936	0	0	0	2
0	UA-IFASA-7108	0	0	2	1
0	UA-IFASA-7656	0	0	0	2
0	UA-IFASA-7773	0	0	2	1
0	UA-IFASA-9363	0	0	1	2
0	UA-IFASA-9625	0	0	2	1
0	BovineHD3200000002	0	190	2	1
0	BovineHD3200000004	0	250	0	2
0	BovineHD3200000005	0	435	0	1
0	BovineHD3200000006	0	480	0	1
0	BovineHD3200000008	0	525	0	1
0	BovineHD3200000011	0	656	0	1
0	BovineHD3200000012	0	679	0	1
0	BovineHD3200000013	0	694	0	1
0	BovineHD3200000014	0	713	0	1
0	BovineHD3200000015	0	735	0	1
0	BovineHD3200000016	0	858	0	2
0	BovineHD3200000017	0	887	0	2
0	BovineHD3200000020	0	1060	0	1
0	BovineHD3200000021	0	1081	0	1
0	BovineHD3200000022	0	1110	2	1
0	BovineHD3200000023	0	1141	0	1
0	BovineHD3200000024	0	1212	0	1
0	BovineHD3200000025	0	1293	0	2
0	BovineHD3200000026	0	1317	0	1
0	BovineHD3200000027	0	1347	0	2
0	BovineHD3200000028	0	1359	0	1
0	BovineHD3200000029	0	1373	0	2
0	BovineHD3200000030	0	1406	0	1
0	BovineHD3200000031	0	1427	0	1
0	BovineHD3200000032	0	1439	0	2
0	BovineHD3200000033	0	1499	0	1
0	BovineHD3200000034	0	1577	0	1
0	BovineHD3200000035	0	1593	0	1
0	BovineHD3200000036	0	1783	0	2
0	BovineHD3200000037	0	1802	0	1
0	BovineHD3200000038	0	1817	0	2
0	BovineHD3200000041	0	1929	0	1
0	BovineHD3200000043	0	2295	0	2
0	BovineHD3200000044	0	2355	0	1
0	BovineHD3200000045	0	2378	0	1
0	BovineHD3200000046	0	2403	0	1
0	BovineHD3200000047	0	2450	0	1
0	BovineHD3200000048	0	2498	0	2
0	BovineHD3200000049	0	2513	0	1
0	BovineHD3200000050	0	2542	0	1
0	BovineHD3200000051	0	2558	2	1
0	BovineHD3200000052	0	2637	0	2
0	BovineHD3200000053	0	2675	0	2
0	BovineHD3200000054	0	2706	0	1
0	BovineHD3200000055	0	2738	0	1
0	BovineHD3200000056	0	2760	0	2
0	BovineHD3200000057	0	2927	0	1
0	BovineHD3200000058	0	3017	0	1
0	BovineHD3200000059	0	3032	0	1
0	BovineHD3200000060	0	3085	0	2
0	BovineHD3200000061	0	3119	0	2
0	BovineHD3200000062	0	3138	0	2
0	BovineHD3200000063	0	3168	0	2
0	BovineHD3200000064	0	3190	0	2
0	BovineHD3200000065	0	3215	0	1
0	BovineHD3200000066	0	3246	0	2
0	BovineHD3200000067	0	3263	0	1
0	BovineHD3200000068	0	3280	0	2
0	BovineHD3200000069	0	3299	0	2
0	BovineHD3200000070	0	3315	0	2
0	BovineHD3200000071	0	3341	2	1
0	BovineHD3200000072	0	3355	0	1
0	BovineHD3200000073	0	3369	0	1
0	BovineHD3200000074	0	3391	2	1
0	BovineHD3200000075	0	3434	0	1
0	BovineHD3200000077	0	3480	0	2
0	BovineHD3200000078	0	3492	0	1
0	BovineHD3200000080	0	3571	0	2
0	BovineHD3200000081	0	3601	0	2
0	BovineHD3200000082	0	3623	0	2
0	BovineHD3200000083	0	3635	0	2
0	BovineHD3200000084	0	3686	0	1
0	BovineHD3200000085	0	3702	0	1
0	BovineHD3200000086	0	3725	0	2
0	BovineHD3200000087	0	3761	0	1
0	BovineHD3200000088	0	3802	0	2
0	BovineHD3200000090	0	3863	0	2
0	BovineHD3200000091	0	3875	0	2
0	BovineHD3200000093	0	3959	0	1
0	BovineHD3200000095	0	4013	0	1
0	BovineHD3200000096	0	4167	0	2
0	BovineHD3200000097	0	4292	0	2
0	BovineHD3200000098	0	4323	0	1
0	BovineHD3200000099	0	4361	0	1
0	BovineHD3200000100	0	4497	0	1
0	BovineHD3200000102	0	4572	2	1
0	BovineHD3200000103	0	4584	0	1
0	BovineHD3200000104	0	4600	0	2
0	BovineHD3200000105	0	4625	0	1
0	BovineHD3200000106	0	4644	0	1
0	BovineHD3200000107	0	4655	0	2
0	BovineHD3200000108	0	4674	0	1
0	BovineHD3200000109	0	4757	0	2
0	BovineHD3200000110	0	4828	0	1
0	BovineHD3200000111	0	4970	0	2
0	BovineHD3200000112	0	5045	0	2
0	BovineHD3200000113	0	5067	0	1
0	BovineHD3200000114	0	5256	0	1
0	BovineHD3200000115	0	5291	0	2
0	BovineHD3200000116	0	5318	0	1
0	BovineHD3200000117	0	5457	0	1
0	BovineHD3200000118	0	5616	0	1
0	BovineHD3200000120	0	5686	0	1
0	BovineHD3200000122	0	5732	0	1
0	BovineHD3200000123	0	5754	0	1
0	BovineHD3200000124	0	5787	0	1
0	BovineHD3200000125	0	5827	0	1
0	BovineHD3200000126	0	5852	0	1
0	BovineHD3200000128	0	5952	0	1
0	BovineHD3200000129	0	5976	0	2
0	BovineHD3200000130	0	5995	0	2
0	BovineHD3200000131	0	6016	0	2
0	BovineHD3200000132	0	6038	0	1
0	BovineHD3200000134	0	6138	0	2
0	BovineHD3200000137	0	6232	0	2
0	BovineHD3200000138	0	6298	0	1
0	BovineHD3200000140	0	6347	0	1
0	BovineHD3200000141	0	6367	2	1
0	BovineHD3200000143	0	6401	0	1
0	BovineHD3200000144	0	6413	0	1
0	BovineHD3200000145	0	6436	2	1
0	BovineHD3200000146	0	6459	0	2
0	BovineHD3200000147	0	6501	0	1
0	BovineHD3200000148	0	6526	0	1
0	BovineHD3200000149	0	6566	0	2
0	BovineHD3200000150	0	6588	0	1
0	BovineHD3200000151	0	6623	0	1
0	BovineHD3200000152	0	6635	0	1
0	BovineHD3200000153	0	6658	2	1
0	BovineHD3200000154	0	6675	0	1
0	BovineHD3200000155	0	6687	0	1
0	BovineHD3200000156	0	6714	0	1
0	BovineHD3200000157	0	6735	0	2
0	BovineHD3200000158	0	6755	0	1
0	BovineHD3200000159	0	6803	0	1
0	BovineHD3200000160	0	6905	0	1
0	BovineHD3200000162	0	6944	0	1
0	BovineHD3200000163	0	6967	0	2
0	BovineHD3200000164	0	7022	0	1
0	BovineHD3200000166	0	7076	0	1
0	BovineHD3200000168	0	7104	0	1
0	BovineHD3200000169	0	7115	0	1
0	BovineHD3200000170	0	7178	0	2
0	BovineHD3200000171	0	7217	0	1
0	BovineHD3200000173	0	7266	0	1
0	BovineHD3200000174	0	7307	0	1
0	BovineHD3200000175	0	7345	0	1
0	BovineHD3200000177	0	7401	2	1
0	BovineHD3200000178	0	7480	0	1
0	BovineHD3200000179	0	7507	0	1
0	BovineHD3200000180	0	7542	0	1
0	BovineHD3200000181	0	7564	0	2
0	BovineHD3200000182	0	7602	0	1
0	BovineHD3200000183	0	7663	0	2
0	BovineHD3200000184	0	7683	0	2
0	BovineHD3200000186	0	7718	2	1
0	BovineHD3200000187	0	7731	0	2
0	BovineHD3200000188	0	7750	0	1
0	BovineHD3200000189	0	7761	0	1
0	BovineHD3200000190	0	7775	0	2
0	BovineHD3200000191	0	7798	0	2
0	BovineHD3200000192	0	7819	0	1
0	BovineHD3200000193	0	7905	0	1
0	BovineHD3200000194	0	7931	0	1
0	BovineHD3200000195	0	7942	0	1
0	BovineHD3200000196	0	7975	0	1
0	BovineHD3200000197	0	7988	1	2
0	BovineHD3200000198	0	8038	0	1
0	BovineHD3200000199	0	8078	0	1
0	BovineHD3200000200	0	8109	0	1
0	BovineHD3200000201	0	8121	0	2
0	BovineHD3200000202	0	8326	2	1
0	BovineHD3200000203	0	8359	0	1
0	BovineHD3200000204	0	8390	0	1
0	BovineHD3200000205	0	8447	0	2
0	BovineHD3200000207	0	8541	0	2
0	BovineHD3200000208	0	8570	0	1
0	BovineHD3200000211	0	8680	0	1
0	BovineHD3200000212	0	8702	0	2
0	BovineHD3200000213	0	8722	0	1
0	BovineHD3200000215	0	8780	0	2
0	BovineHD3200000216	0	8854	0	1
0	BovineHD3200000217	0	8867	0	2
0	BovineHD3200000218	0	8881	0	1
0	BovineHD3200000220	0	8926	2	1
0	BovineHD3200000221	0	8946	0	1
0	BovineHD3200000222	0	8968	0	2
0	BovineHD3200000223	0	8982	0	2
0	BovineHD3200000224	0	9001	0	2
0	BovineHD3200000225	0	9015	0	2
0	BovineHD3200000226	0	9068	2	1
0	BovineHD3200000227	0	9084	0	2
0	BovineHD3200000228	0	9132	0	1
0	BovineHD3200000229	0	9174	0	1
0	BovineHD3200000230	0	9191	0	2
0	BovineHD3200000231	0	9213	0	1
0	BovineHD3200000232	0	9240	0	1
0	BovineHD3200000233	0	9255	0	1
0	BovineHD3200000234	0	9453	0	1
0	BovineHD3200000235	0	9465	0	2
0	BovineHD3200000236	0	9496	0	2
0	BovineHD3200000237	0	9537	0	1
0	BovineHD3200000238	0	9549	0	1
0	BovineHD3200000239	0	9573	0	1
0	BovineHD3200000240	0	9589	0	2
0	BovineHD3200000242	0	9622	0	1
0	BovineHD3200000244	0	9729	2	1
0	BovineHD3200000246	0	9763	0	1
0	BovineHD3200000248	0	9883	0	1
0	BovineHD3200000250	0	9940	0	1
0	BovineHD3200000252	0	9978	1	2
0	BovineHD3200000254	0	10018	0	1
0	BovineHD3200000255	0	10037	0	2
0	BovineHD3200000256	0	10071	0	1
0	BovineHD3200000257	0	10103	0	2
0	BovineHD3200000258	0	10114	0	1
0	BovineHD3200000259	0	10162	0	2
0	BovineHD3200000260	0	10248	2	1
0	BovineHD3200000261	0	10323	0	2
0	BovineHD3200000262	0	10349	2	1
0	BovineHD3200000263	0	10371	0	1
0	BovineHD3200000266	0	10506	0	1
0	BovineHD3200000267	0	10600	0	1
0	BovineHD3200000268	0	10647	0	2
0	BovineHD3200000269	0	10674	0	1
0	BovineHD3200000270	0	10704	0	2
0	BovineHD3200000271	0	10907	2	1
0	BovineHD3200000272	0	10956	0	2
0	BovineHD3200000273	0	11002	0	2
0	BovineHD3200000274	0	11105	0	1
0	BovineHD3200000276	0	11197	0	1
0	BovineHD3200000277	0	11218	2	1
0	BovineHD3200000278	0	11253	0	1
0	BovineHD3200000280	0	11311	2	1
0	BovineHD3200000281	0	11327	0	2
0	BovineHD3200000282	0	11360	2	1
0	BovineHD3200000283	0	11391	0	2
0	BovineHD3200000284	0	11436	0	2
0	BovineHD3200000285	0	11490	0	2
0	BovineHD3200000286	0	11511	0	1
0	BovineHD3200000288	0	11572	0	2
0	BovineHD3200000289	0	11584	0	2
0	BovineHD3200000290	0	11605	0	2
0	BovineHD3200000291	0	11646	0	1
0	BovineHD3200000292	0	11658	0	1
0	BovineHD3200000293	0	11669	0	1
0	BovineHD3200000294	0	11786	0	2
0	BovineHD3200000295	0	11831	0	1
0	BovineHD3200000296	0	11962	0	2
0	BovineHD3200000297	0	12039	0	1
0	BovineHD3200000298	0	12137	0	2
0	BovineHD3200000299	0	12158	0	2
0	BovineHD3200000300	0	12482	0	2
0	BovineHD3200000301	0	12502	0	1
0	BovineHD3200000302	0	12515	0	2
0	BovineHD3200000303	0	12560	0	1
0	BovineHD3200000304	0	12579	0	2
0	BovineHD3200000305	0	12593	0	1
0	BovineHD3200000306	0	12616	2	1
0	BovineHD3200000307	0	12649	0	1
0	BovineHD3200000308	0	12667	2	1
0	BovineHD3200000309	0	12687	0	1
0	BovineHD3200000310	0	12719	0	2
0	BovineHD3200000311	0	12730	2	1
0	BovineHD3200000312	0	12750	1	2
[truncated: 775,962 more rows]
