# Supplementary material for: Genome-wide association study using haplotype alleles for the evaluation of reproductive traits in Nelore cattle
Source: PLoS One. 2018 Aug 8;13(8):e0201876. doi: 10.1371/journal.pone.0201876 (PMC6082543; doi:10.1371/journal.pone.0201876)
Supplement: S2 Dataset — (GZ) [file pone.0201876.s007.gz › plos_gen2.fam]

FAM 0001 0 0 0 -9
FAM 0002 0 0 0 -9
FAM 0003 0 0 0 -9
FAM 0004 0 0 0 -9
FAM 0005 0 0 0 -9
FAM 0006 0 0 0 -9
FAM 0007 0 0 0 -9
FAM 0008 0 0 0 -9
FAM 0009 0 0 0 -9
FAM 0010 0 0 0 -9
FAM 0011 0 0 0 -9
FAM 0012 0 0 0 -9
FAM 0013 0 0 0 -9
FAM 0014 0 0 0 -9
FAM 0015 0 0 0 -9
FAM 0016 0 0 0 -9
FAM 0017 0 0 0 -9
FAM 0018 0 0 0 -9
FAM 0019 0 0 0 -9
FAM 0020 0 0 0 -9
FAM 0021 0 0 0 -9
FAM 0022 0 0 0 -9
FAM 0023 0 0 0 -9
FAM 0024 0 0 0 -9
FAM 0025 0 0 0 -9
FAM 0026 0 0 0 -9
FAM 0027 0 0 0 -9
FAM 0028 0 0 0 -9
FAM 0029 0 0 0 -9
FAM 0030 0 0 0 -9
FAM 0031 0 0 0 -9
FAM 0032 0 0 0 -9
FAM 0033 0 0 0 -9
FAM 0034 0 0 0 -9
FAM 0035 0 0 0 -9
FAM 0036 0 0 0 -9
FAM 0037 0 0 0 -9
FAM 0038 0 0 0 -9
FAM 0039 0 0 0 -9
FAM 0040 0 0 0 -9
FAM 0041 0 0 0 -9
FAM 0042 0 0 0 -9
FAM 0043 0 0 0 -9
FAM 0044 0 0 0 -9
FAM 0045 0 0 0 -9
FAM 0046 0 0 0 -9
FAM 0047 0 0 0 -9
FAM 0048 0 0 0 -9
FAM 0049 0 0 0 -9
FAM 0050 0 0 0 -9
FAM 0051 0 0 0 -9
FAM 0052 0 0 0 -9
FAM 0053 0 0 0 -9
FAM 0054 0 0 0 -9
FAM 0055 0 0 0 -9
FAM 0056 0 0 0 -9
FAM 0057 0 0 0 -9
FAM 0058 0 0 0 -9
FAM 0059 0 0 0 -9
FAM 0060 0 0 0 -9
FAM 0061 0 0 0 -9
FAM 0062 0 0 0 -9
FAM 0063 0 0 0 -9
FAM 0064 0 0 0 -9
FAM 0065 0 0 0 -9
FAM 0066 0 0 0 -9
FAM 0067 0 0 0 -9
FAM 0068 0 0 0 -9
FAM 0069 0 0 0 -9
FAM 0070 0 0 0 -9
FAM 0071 0 0 0 -9
FAM 0072 0 0 0 -9
FAM 0073 0 0 0 -9
FAM 0074 0 0 0 -9
FAM 0075 0 0 0 -9
FAM 0076 0 0 0 -9
FAM 0077 0 0 0 -9
FAM 0078 0 0 0 -9
FAM 0079 0 0 0 -9
FAM 0080 0 0 0 -9
FAM 0081 0 0 0 -9
FAM 0082 0 0 0 -9
FAM 0083 0 0 0 -9
FAM 0084 0 0 0 -9
FAM 0085 0 0 0 -9
FAM 0086 0 0 0 -9
FAM 0087 0 0 0 -9
FAM 0088 0 0 0 -9
FAM 0089 0 0 0 -9
FAM 0090 0 0 0 -9
FAM 0091 0 0 0 -9
FAM 0092 0 0 0 -9
FAM 0093 0 0 0 -9
FAM 0094 0 0 0 -9
FAM 0095 0 0 0 -9
FAM 0096 0 0 0 -9
FAM 0097 0 0 0 -9
FAM 0098 0 0 0 -9
FAM 0099 0 0 0 -9
FAM 0100 0 0 0 -9
FAM 0101 0 0 0 -9
FAM 0102 0 0 0 -9
FAM 0103 0 0 0 -9
FAM 0104 0 0 0 -9
FAM 0105 0 0 0 -9
FAM 0106 0 0 0 -9
FAM 0107 0 0 0 -9
FAM 0108 0 0 0 -9
FAM 0109 0 0 0 -9
FAM 0110 0 0 0 -9
FAM 0111 0 0 0 -9
FAM 0112 0 0 0 -9
FAM 0113 0 0 0 -9
FAM 0114 0 0 0 -9
FAM 0115 0 0 0 -9
FAM 0116 0 0 0 -9
FAM 0117 0 0 0 -9
FAM 0118 0 0 0 -9
FAM 0119 0 0 0 -9
FAM 0120 0 0 0 -9
FAM 0121 0 0 0 -9
FAM 0122 0 0 0 -9
FAM 0123 0 0 0 -9
FAM 0124 0 0 0 -9
FAM 0125 0 0 0 -9
FAM 0126 0 0 0 -9
FAM 0127 0 0 0 -9
FAM 0128 0 0 0 -9
FAM 0129 0 0 0 -9
FAM 0130 0 0 0 -9
FAM 0131 0 0 0 -9
FAM 0132 0 0 0 -9
FAM 0133 0 0 0 -9
FAM 0134 0 0 0 -9
FAM 0135 0 0 0 -9
FAM 0136 0 0 0 -9
FAM 0137 0 0 0 -9
FAM 0138 0 0 0 -9
FAM 0139 0 0 0 -9
FAM 0140 0 0 0 -9
FAM 0141 0 0 0 -9
FAM 0142 0 0 0 -9
FAM 0143 0 0 0 -9
FAM 0144 0 0 0 -9
FAM 0145 0 0 0 -9
FAM 0146 0 0 0 -9
FAM 0147 0 0 0 -9
FAM 0148 0 0 0 -9
FAM 0149 0 0 0 -9
FAM 0150 0 0 0 -9
FAM 0151 0 0 0 -9
FAM 0152 0 0 0 -9
FAM 0153 0 0 0 -9
FAM 0154 0 0 0 -9
FAM 0155 0 0 0 -9
FAM 0156 0 0 0 -9
FAM 0157 0 0 0 -9
FAM 0158 0 0 0 -9
FAM 0159 0 0 0 -9
FAM 0160 0 0 0 -9
FAM 0161 0 0 0 -9
FAM 0162 0 0 0 -9
FAM 0163 0 0 0 -9
FAM 0164 0 0 0 -9
FAM 0165 0 0 0 -9
FAM 0166 0 0 0 -9
FAM 0167 0 0 0 -9
FAM 0168 0 0 0 -9
FAM 0169 0 0 0 -9
FAM 0170 0 0 0 -9
FAM 0171 0 0 0 -9
FAM 0172 0 0 0 -9
FAM 0173 0 0 0 -9
FAM 0174 0 0 0 -9
FAM 0175 0 0 0 -9
FAM 0176 0 0 0 -9
FAM 0177 0 0 0 -9
FAM 0178 0 0 0 -9
FAM 0179 0 0 0 -9
FAM 0180 0 0 0 -9
FAM 0181 0 0 0 -9
FAM 0182 0 0 0 -9
FAM 0183 0 0 0 -9
FAM 0184 0 0 0 -9
FAM 0185 0 0 0 -9
FAM 0186 0 0 0 -9
FAM 0187 0 0 0 -9
FAM 0188 0 0 0 -9
FAM 0189 0 0 0 -9
FAM 0190 0 0 0 -9
FAM 0191 0 0 0 -9
FAM 0192 0 0 0 -9
FAM 0193 0 0 0 -9
FAM 0194 0 0 0 -9
FAM 0195 0 0 0 -9
FAM 0196 0 0 0 -9
FAM 0197 0 0 0 -9
FAM 0198 0 0 0 -9
FAM 0199 0 0 0 -9
FAM 0200 0 0 0 -9
FAM 0201 0 0 0 -9
FAM 0202 0 0 0 -9
FAM 0203 0 0 0 -9
FAM 0204 0 0 0 -9
FAM 0205 0 0 0 -9
FAM 0206 0 0 0 -9
FAM 0207 0 0 0 -9
FAM 0208 0 0 0 -9
FAM 0209 0 0 0 -9
FAM 0210 0 0 0 -9
FAM 0211 0 0 0 -9
FAM 0212 0 0 0 -9
FAM 0213 0 0 0 -9
FAM 0214 0 0 0 -9
FAM 0215 0 0 0 -9
FAM 0216 0 0 0 -9
FAM 0217 0 0 0 -9
FAM 0218 0 0 0 -9
FAM 0219 0 0 0 -9
FAM 0220 0 0 0 -9
FAM 0221 0 0 0 -9
FAM 0222 0 0 0 -9
FAM 0223 0 0 0 -9
FAM 0224 0 0 0 -9
FAM 0225 0 0 0 -9
FAM 0226 0 0 0 -9
FAM 0227 0 0 0 -9
FAM 0228 0 0 0 -9
FAM 0229 0 0 0 -9
FAM 0230 0 0 0 -9
FAM 0231 0 0 0 -9
FAM 0232 0 0 0 -9
FAM 0233 0 0 0 -9
FAM 0234 0 0 0 -9
FAM 0235 0 0 0 -9
FAM 0236 0 0 0 -9
FAM 0237 0 0 0 -9
FAM 0238 0 0 0 -9
FAM 0239 0 0 0 -9
FAM 0240 0 0 0 -9
FAM 0241 0 0 0 -9
FAM 0242 0 0 0 -9
FAM 0243 0 0 0 -9
FAM 0244 0 0 0 -9
FAM 0245 0 0 0 -9
FAM 0246 0 0 0 -9
FAM 0247 0 0 0 -9
FAM 0248 0 0 0 -9
FAM 0249 0 0 0 -9
FAM 0250 0 0 0 -9
FAM 0251 0 0 0 -9
FAM 0252 0 0 0 -9
FAM 0253 0 0 0 -9
FAM 0254 0 0 0 -9
FAM 0255 0 0 0 -9
FAM 0256 0 0 0 -9
FAM 0257 0 0 0 -9
FAM 0258 0 0 0 -9
FAM 0259 0 0 0 -9
FAM 0260 0 0 0 -9
FAM 0261 0 0 0 -9
FAM 0262 0 0 0 -9
FAM 0263 0 0 0 -9
FAM 0264 0 0 0 -9
FAM 0265 0 0 0 -9
FAM 0266 0 0 0 -9
FAM 0267 0 0 0 -9
FAM 0268 0 0 0 -9
FAM 0269 0 0 0 -9
FAM 0270 0 0 0 -9
FAM 0271 0 0 0 -9
FAM 0272 0 0 0 -9
FAM 0273 0 0 0 -9
FAM 0274 0 0 0 -9
FAM 0275 0 0 0 -9
FAM 0276 0 0 0 -9
FAM 0277 0 0 0 -9
FAM 0278 0 0 0 -9
FAM 0279 0 0 0 -9
FAM 0280 0 0 0 -9
FAM 0281 0 0 0 -9
FAM 0282 0 0 0 -9
FAM 0283 0 0 0 -9
FAM 0284 0 0 0 -9
FAM 0285 0 0 0 -9
FAM 0286 0 0 0 -9
FAM 0287 0 0 0 -9
FAM 0288 0 0 0 -9
FAM 0289 0 0 0 -9
FAM 0290 0 0 0 -9
FAM 0291 0 0 0 -9
FAM 0292 0 0 0 -9
FAM 0293 0 0 0 -9
FAM 0294 0 0 0 -9
FAM 0295 0 0 0 -9
FAM 0296 0 0 0 -9
FAM 0297 0 0 0 -9
FAM 0298 0 0 0 -9
FAM 0299 0 0 0 -9
FAM 0300 0 0 0 -9
FAM 0301 0 0 0 -9
FAM 0302 0 0 0 -9
FAM 0303 0 0 0 -9
FAM 0304 0 0 0 -9
FAM 0305 0 0 0 -9
FAM 0306 0 0 0 -9
FAM 0307 0 0 0 -9
FAM 0308 0 0 0 -9
FAM 0309 0 0 0 -9
FAM 0310 0 0 0 -9
FAM 0311 0 0 0 -9
FAM 0312 0 0 0 -9
FAM 0313 0 0 0 -9
FAM 0314 0 0 0 -9
FAM 0315 0 0 0 -9
FAM 0316 0 0 0 -9
FAM 0317 0 0 0 -9
FAM 0318 0 0 0 -9
FAM 0319 0 0 0 -9
FAM 0320 0 0 0 -9
FAM 0321 0 0 0 -9
FAM 0322 0 0 0 -9
FAM 0323 0 0 0 -9
FAM 0324 0 0 0 -9
FAM 0325 0 0 0 -9
FAM 0326 0 0 0 -9
FAM 0327 0 0 0 -9
FAM 0328 0 0 0 -9
FAM 0329 0 0 0 -9
FAM 0330 0 0 0 -9
FAM 0331 0 0 0 -9
FAM 0332 0 0 0 -9
FAM 0333 0 0 0 -9
FAM 0334 0 0 0 -9
FAM 0335 0 0 0 -9
FAM 0336 0 0 0 -9
FAM 0337 0 0 0 -9
FAM 0338 0 0 0 -9
FAM 0339 0 0 0 -9
FAM 0340 0 0 0 -9
FAM 0341 0 0 0 -9
FAM 0342 0 0 0 -9
FAM 0343 0 0 0 -9
FAM 0344 0 0 0 -9
FAM 0345 0 0 0 -9
FAM 0346 0 0 0 -9
FAM 0347 0 0 0 -9
FAM 0348 0 0 0 -9
FAM 0349 0 0 0 -9
FAM 0350 0 0 0 -9
FAM 0351 0 0 0 -9
FAM 0352 0 0 0 -9
FAM 0353 0 0 0 -9
FAM 0354 0 0 0 -9
FAM 0355 0 0 0 -9
FAM 0356 0 0 0 -9
FAM 0357 0 0 0 -9
FAM 0358 0 0 0 -9
FAM 0359 0 0 0 -9
FAM 0360 0 0 0 -9
FAM 0361 0 0 0 -9
FAM 0362 0 0 0 -9
FAM 0363 0 0 0 -9
FAM 0364 0 0 0 -9
FAM 0365 0 0 0 -9
FAM 0366 0 0 0 -9
FAM 0367 0 0 0 -9
FAM 0368 0 0 0 -9
FAM 0369 0 0 0 -9
FAM 0370 0 0 0 -9
FAM 0371 0 0 0 -9
FAM 0372 0 0 0 -9
FAM 0373 0 0 0 -9
FAM 0374 0 0 0 -9
FAM 0375 0 0 0 -9
FAM 0376 0 0 0 -9
FAM 0377 0 0 0 -9
FAM 0378 0 0 0 -9
FAM 0379 0 0 0 -9
FAM 0380 0 0 0 -9
FAM 0381 0 0 0 -9
FAM 0382 0 0 0 -9
FAM 0383 0 0 0 -9
FAM 0384 0 0 0 -9
FAM 0385 0 0 0 -9
FAM 0386 0 0 0 -9
FAM 0387 0 0 0 -9
FAM 0388 0 0 0 -9
FAM 0389 0 0 0 -9
FAM 0390 0 0 0 -9
FAM 0391 0 0 0 -9
FAM 0392 0 0 0 -9
FAM 0393 0 0 0 -9
FAM 0394 0 0 0 -9
FAM 0395 0 0 0 -9
FAM 0396 0 0 0 -9
FAM 0397 0 0 0 -9
FAM 0398 0 0 0 -9
FAM 0399 0 0 0 -9
FAM 0400 0 0 0 -9
FAM 0401 0 0 0 -9
FAM 0402 0 0 0 -9
FAM 0403 0 0 0 -9
FAM 0404 0 0 0 -9
FAM 0405 0 0 0 -9
FAM 0406 0 0 0 -9
FAM 0407 0 0 0 -9
FAM 0408 0 0 0 -9
FAM 0409 0 0 0 -9
FAM 0410 0 0 0 -9
FAM 0411 0 0 0 -9
FAM 0412 0 0 0 -9
FAM 0413 0 0 0 -9
FAM 0414 0 0 0 -9
FAM 0415 0 0 0 -9
FAM 0416 0 0 0 -9
FAM 0417 0 0 0 -9
FAM 0418 0 0 0 -9
FAM 0419 0 0 0 -9
FAM 0420 0 0 0 -9
FAM 0421 0 0 0 -9
FAM 0422 0 0 0 -9
FAM 0423 0 0 0 -9
FAM 0424 0 0 0 -9
FAM 0425 0 0 0 -9
FAM 0426 0 0 0 -9
FAM 0427 0 0 0 -9
FAM 0428 0 0 0 -9
FAM 0429 0 0 0 -9
FAM 0430 0 0 0 -9
FAM 0431 0 0 0 -9
FAM 0432 0 0 0 -9
FAM 0433 0 0 0 -9
FAM 0434 0 0 0 -9
FAM 0435 0 0 0 -9
FAM 0436 0 0 0 -9
FAM 0437 0 0 0 -9
FAM 0438 0 0 0 -9
FAM 0439 0 0 0 -9
FAM 0440 0 0 0 -9
FAM 0441 0 0 0 -9
FAM 0442 0 0 0 -9
FAM 0443 0 0 0 -9
FAM 0444 0 0 0 -9
FAM 0445 0 0 0 -9
FAM 0446 0 0 0 -9
FAM 0447 0 0 0 -9
FAM 0448 0 0 0 -9
FAM 0449 0 0 0 -9
FAM 0450 0 0 0 -9
FAM 0451 0 0 0 -9
FAM 0452 0 0 0 -9
FAM 0453 0 0 0 -9
FAM 0454 0 0 0 -9
FAM 0455 0 0 0 -9
FAM 0456 0 0 0 -9
FAM 0457 0 0 0 -9
FAM 0458 0 0 0 -9
FAM 0459 0 0 0 -9
FAM 0460 0 0 0 -9
FAM 0461 0 0 0 -9
FAM 0462 0 0 0 -9
FAM 0463 0 0 0 -9
FAM 0464 0 0 0 -9
FAM 0465 0 0 0 -9
FAM 0466 0 0 0 -9
FAM 0467 0 0 0 -9
FAM 0468 0 0 0 -9
FAM 0469 0 0 0 -9
FAM 0470 0 0 0 -9
FAM 0471 0 0 0 -9
FAM 0472 0 0 0 -9
FAM 0473 0 0 0 -9
FAM 0474 0 0 0 -9
FAM 0475 0 0 0 -9
FAM 0476 0 0 0 -9
FAM 0477 0 0 0 -9
FAM 0478 0 0 0 -9
FAM 0479 0 0 0 -9
FAM 0480 0 0 0 -9
FAM 0481 0 0 0 -9
FAM 0482 0 0 0 -9
FAM 0483 0 0 0 -9
FAM 0484 0 0 0 -9
FAM 0485 0 0 0 -9
FAM 0486 0 0 0 -9
FAM 0487 0 0 0 -9
FAM 0488 0 0 0 -9
FAM 0489 0 0 0 -9
FAM 0490 0 0 0 -9
FAM 0491 0 0 0 -9
FAM 0492 0 0 0 -9
FAM 0493 0 0 0 -9
FAM 0494 0 0 0 -9
FAM 0495 0 0 0 -9
FAM 0496 0 0 0 -9
FAM 0497 0 0 0 -9
FAM 0498 0 0 0 -9
FAM 0499 0 0 0 -9
FAM 0500 0 0 0 -9
FAM 0501 0 0 0 -9
FAM 0502 0 0 0 -9
FAM 0503 0 0 0 -9
FAM 0504 0 0 0 -9
FAM 0505 0 0 0 -9
FAM 0506 0 0 0 -9
FAM 0507 0 0 0 -9
FAM 0508 0 0 0 -9
FAM 0509 0 0 0 -9
FAM 0510 0 0 0 -9
FAM 0511 0 0 0 -9
FAM 0512 0 0 0 -9
FAM 0513 0 0 0 -9
FAM 0514 0 0 0 -9
FAM 0515 0 0 0 -9
FAM 0516 0 0 0 -9
FAM 0517 0 0 0 -9
FAM 0518 0 0 0 -9
FAM 0519 0 0 0 -9
FAM 0520 0 0 0 -9
FAM 0521 0 0 0 -9
FAM 0522 0 0 0 -9
FAM 0523 0 0 0 -9
FAM 0524 0 0 0 -9
FAM 0525 0 0 0 -9
FAM 0526 0 0 0 -9
FAM 0527 0 0 0 -9
FAM 0528 0 0 0 -9
FAM 0529 0 0 0 -9
FAM 0530 0 0 0 -9
FAM 0531 0 0 0 -9
FAM 0532 0 0 0 -9
FAM 0533 0 0 0 -9
FAM 0534 0 0 0 -9
FAM 0535 0 0 0 -9
FAM 0536 0 0 0 -9
FAM 0537 0 0 0 -9
FAM 0538 0 0 0 -9
FAM 0539 0 0 0 -9
FAM 0540 0 0 0 -9
FAM 0541 0 0 0 -9
FAM 0542 0 0 0 -9
FAM 0543 0 0 0 -9
FAM 0544 0 0 0 -9
FAM 0545 0 0 0 -9
FAM 0546 0 0 0 -9
FAM 0547 0 0 0 -9
FAM 0548 0 0 0 -9
FAM 0549 0 0 0 -9
FAM 0550 0 0 0 -9
FAM 0551 0 0 0 -9
FAM 0552 0 0 0 -9
FAM 0553 0 0 0 -9
FAM 0554 0 0 0 -9
FAM 0555 0 0 0 -9
FAM 0556 0 0 0 -9
FAM 0557 0 0 0 -9
FAM 0558 0 0 0 -9
FAM 0559 0 0 0 -9
FAM 0560 0 0 0 -9
FAM 0561 0 0 0 -9
FAM 0562 0 0 0 -9
FAM 0563 0 0 0 -9
FAM 0564 0 0 0 -9
FAM 0565 0 0 0 -9
FAM 0566 0 0 0 -9
FAM 0567 0 0 0 -9
FAM 0568 0 0 0 -9
FAM 0569 0 0 0 -9
FAM 0570 0 0 0 -9
FAM 0571 0 0 0 -9
FAM 0572 0 0 0 -9
FAM 0573 0 0 0 -9
FAM 0574 0 0 0 -9
FAM 0575 0 0 0 -9
FAM 0576 0 0 0 -9
FAM 0577 0 0 0 -9
FAM 0578 0 0 0 -9
FAM 0579 0 0 0 -9
FAM 0580 0 0 0 -9
FAM 0581 0 0 0 -9
FAM 0582 0 0 0 -9
FAM 0583 0 0 0 -9
FAM 0584 0 0 0 -9
FAM 0585 0 0 0 -9
FAM 0586 0 0 0 -9
FAM 0587 0 0 0 -9
FAM 0588 0 0 0 -9
FAM 0589 0 0 0 -9
FAM 0590 0 0 0 -9
FAM 0591 0 0 0 -9
FAM 0592 0 0 0 -9
FAM 0593 0 0 0 -9
FAM 0594 0 0 0 -9
FAM 0595 0 0 0 -9
FAM 0596 0 0 0 -9
FAM 0597 0 0 0 -9
FAM 0598 0 0 0 -9
FAM 0599 0 0 0 -9
FAM 0600 0 0 0 -9
FAM 0601 0 0 0 -9
FAM 0602 0 0 0 -9
FAM 0603 0 0 0 -9
FAM 0604 0 0 0 -9
FAM 0605 0 0 0 -9
FAM 0606 0 0 0 -9
FAM 0607 0 0 0 -9
FAM 0608 0 0 0 -9
FAM 0609 0 0 0 -9
FAM 0610 0 0 0 -9
FAM 0611 0 0 0 -9
FAM 0612 0 0 0 -9
FAM 0613 0 0 0 -9
FAM 0614 0 0 0 -9
FAM 0615 0 0 0 -9
FAM 0616 0 0 0 -9
FAM 0617 0 0 0 -9
FAM 0618 0 0 0 -9
FAM 0619 0 0 0 -9
FAM 0620 0 0 0 -9
FAM 0621 0 0 0 -9
FAM 0622 0 0 0 -9
FAM 0623 0 0 0 -9
FAM 0624 0 0 0 -9
FAM 0625 0 0 0 -9
FAM 0626 0 0 0 -9
FAM 0627 0 0 0 -9
FAM 0628 0 0 0 -9
FAM 0629 0 0 0 -9
FAM 0630 0 0 0 -9
FAM 0631 0 0 0 -9
FAM 0632 0 0 0 -9
FAM 0633 0 0 0 -9
FAM 0634 0 0 0 -9
FAM 0635 0 0 0 -9
FAM 0636 0 0 0 -9
FAM 0637 0 0 0 -9
FAM 0638 0 0 0 -9
FAM 0639 0 0 0 -9
FAM 0640 0 0 0 -9
FAM 0641 0 0 0 -9
FAM 0642 0 0 0 -9
FAM 0643 0 0 0 -9
FAM 0644 0 0 0 -9
FAM 0645 0 0 0 -9
FAM 0646 0 0 0 -9
FAM 0647 0 0 0 -9
FAM 0648 0 0 0 -9
FAM 0649 0 0 0 -9
FAM 0650 0 0 0 -9
FAM 0651 0 0 0 -9
FAM 0652 0 0 0 -9
FAM 0653 0 0 0 -9
FAM 0654 0 0 0 -9
FAM 0655 0 0 0 -9
FAM 0656 0 0 0 -9
FAM 0657 0 0 0 -9
FAM 0658 0 0 0 -9
FAM 0659 0 0 0 -9
FAM 0660 0 0 0 -9
FAM 0661 0 0 0 -9
FAM 0662 0 0 0 -9
FAM 0663 0 0 0 -9
FAM 0664 0 0 0 -9
FAM 0665 0 0 0 -9
FAM 0666 0 0 0 -9
FAM 0667 0 0 0 -9
FAM 0668 0 0 0 -9
FAM 0669 0 0 0 -9
FAM 0670 0 0 0 -9
FAM 0671 0 0 0 -9
FAM 0672 0 0 0 -9
FAM 0673 0 0 0 -9
FAM 0674 0 0 0 -9
FAM 0675 0 0 0 -9
FAM 0676 0 0 0 -9
FAM 0677 0 0 0 -9
FAM 0678 0 0 0 -9
FAM 0679 0 0 0 -9
FAM 0680 0 0 0 -9
FAM 0681 0 0 0 -9
FAM 0682 0 0 0 -9
FAM 0683 0 0 0 -9
FAM 0684 0 0 0 -9
FAM 0685 0 0 0 -9
FAM 0686 0 0 0 -9
FAM 0687 0 0 0 -9
FAM 0688 0 0 0 -9
FAM 0689 0 0 0 -9
FAM 0690 0 0 0 -9
FAM 0691 0 0 0 -9
FAM 0692 0 0 0 -9
FAM 0693 0 0 0 -9
FAM 0694 0 0 0 -9
FAM 0695 0 0 0 -9
FAM 0696 0 0 0 -9
FAM 0697 0 0 0 -9
FAM 0698 0 0 0 -9
FAM 0699 0 0 0 -9
FAM 0700 0 0 0 -9
FAM 0701 0 0 0 -9
FAM 0702 0 0 0 -9
FAM 0703 0 0 0 -9
FAM 0704 0 0 0 -9
FAM 0705 0 0 0 -9
FAM 0706 0 0 0 -9
FAM 0707 0 0 0 -9
FAM 0708 0 0 0 -9
FAM 0709 0 0 0 -9
FAM 0710 0 0 0 -9
FAM 0711 0 0 0 -9
FAM 0712 0 0 0 -9
FAM 0713 0 0 0 -9
FAM 0714 0 0 0 -9
FAM 0715 0 0 0 -9
FAM 0716 0 0 0 -9
FAM 0717 0 0 0 -9
FAM 0718 0 0 0 -9
FAM 0719 0 0 0 -9
FAM 0720 0 0 0 -9
FAM 0721 0 0 0 -9
FAM 0722 0 0 0 -9
FAM 0723 0 0 0 -9
FAM 0724 0 0 0 -9
FAM 0725 0 0 0 -9
FAM 0726 0 0 0 -9
FAM 0727 0 0 0 -9
FAM 0728 0 0 0 -9
FAM 0729 0 0 0 -9
FAM 0730 0 0 0 -9
FAM 0731 0 0 0 -9
FAM 0732 0 0 0 -9
FAM 0733 0 0 0 -9
FAM 0734 0 0 0 -9
FAM 0735 0 0 0 -9
FAM 0736 0 0 0 -9
FAM 0737 0 0 0 -9
FAM 0738 0 0 0 -9
FAM 0739 0 0 0 -9
FAM 0740 0 0 0 -9
FAM 0741 0 0 0 -9
FAM 0742 0 0 0 -9
FAM 0743 0 0 0 -9
FAM 0744 0 0 0 -9
FAM 0745 0 0 0 -9
FAM 0746 0 0 0 -9
FAM 0747 0 0 0 -9
FAM 0748 0 0 0 -9
FAM 0749 0 0 0 -9
FAM 0750 0 0 0 -9
FAM 0751 0 0 0 -9
FAM 0752 0 0 0 -9
FAM 0753 0 0 0 -9
FAM 0754 0 0 0 -9
FAM 0755 0 0 0 -9
FAM 0756 0 0 0 -9
FAM 0757 0 0 0 -9
FAM 0758 0 0 0 -9
FAM 0759 0 0 0 -9
FAM 0760 0 0 0 -9
FAM 0761 0 0 0 -9
FAM 0762 0 0 0 -9
FAM 0763 0 0 0 -9
FAM 0764 0 0 0 -9
FAM 0765 0 0 0 -9
FAM 0766 0 0 0 -9
FAM 0767 0 0 0 -9
FAM 0768 0 0 0 -9
FAM 0769 0 0 0 -9
FAM 0770 0 0 0 -9
FAM 0771 0 0 0 -9
FAM 0772 0 0 0 -9
FAM 0773 0 0 0 -9
FAM 0774 0 0 0 -9
FAM 0775 0 0 0 -9
FAM 0776 0 0 0 -9
FAM 0777 0 0 0 -9
FAM 0778 0 0 0 -9
FAM 0779 0 0 0 -9
FAM 0780 0 0 0 -9
FAM 0781 0 0 0 -9
FAM 0782 0 0 0 -9
FAM 0783 0 0 0 -9
FAM 0784 0 0 0 -9
FAM 0785 0 0 0 -9
FAM 0786 0 0 0 -9
FAM 0787 0 0 0 -9
FAM 0788 0 0 0 -9
FAM 0789 0 0 0 -9
FAM 0790 0 0 0 -9
FAM 0791 0 0 0 -9
FAM 0792 0 0 0 -9
FAM 0793 0 0 0 -9
FAM 0794 0 0 0 -9
FAM 0795 0 0 0 -9
FAM 0796 0 0 0 -9
FAM 0797 0 0 0 -9
FAM 0798 0 0 0 -9
FAM 0799 0 0 0 -9
FAM 0800 0 0 0 -9
FAM 0801 0 0 0 -9
FAM 0802 0 0 0 -9
FAM 0803 0 0 0 -9
FAM 0804 0 0 0 -9
FAM 0805 0 0 0 -9
FAM 0806 0 0 0 -9
FAM 0807 0 0 0 -9
FAM 0808 0 0 0 -9
FAM 0809 0 0 0 -9
FAM 0810 0 0 0 -9
FAM 0811 0 0 0 -9
FAM 0812 0 0 0 -9
FAM 0813 0 0 0 -9
FAM 0814 0 0 0 -9
FAM 0815 0 0 0 -9
FAM 0816 0 0 0 -9
FAM 0817 0 0 0 -9
FAM 0818 0 0 0 -9
FAM 0819 0 0 0 -9
FAM 0820 0 0 0 -9
FAM 0821 0 0 0 -9
FAM 0822 0 0 0 -9
FAM 0823 0 0 0 -9
FAM 0824 0 0 0 -9
FAM 0825 0 0 0 -9
FAM 0826 0 0 0 -9
FAM 0827 0 0 0 -9
FAM 0828 0 0 0 -9
FAM 0829 0 0 0 -9
FAM 0830 0 0 0 -9
FAM 0831 0 0 0 -9
FAM 0832 0 0 0 -9
FAM 0833 0 0 0 -9
FAM 0834 0 0 0 -9
FAM 0835 0 0 0 -9
FAM 0836 0 0 0 -9
FAM 0837 0 0 0 -9
FAM 0838 0 0 0 -9
FAM 0839 0 0 0 -9
FAM 0840 0 0 0 -9
FAM 0841 0 0 0 -9
FAM 0842 0 0 0 -9
FAM 0843 0 0 0 -9
FAM 0844 0 0 0 -9
FAM 0845 0 0 0 -9
FAM 0846 0 0 0 -9
FAM 0847 0 0 0 -9
FAM 0848 0 0 0 -9
FAM 0849 0 0 0 -9
FAM 0850 0 0 0 -9
FAM 0851 0 0 0 -9
FAM 0852 0 0 0 -9
FAM 0853 0 0 0 -9
FAM 0854 0 0 0 -9
FAM 0855 0 0 0 -9
FAM 0856 0 0 0 -9
FAM 0857 0 0 0 -9
FAM 0858 0 0 0 -9
FAM 0859 0 0 0 -9
FAM 0860 0 0 0 -9
FAM 0861 0 0 0 -9
FAM 0862 0 0 0 -9
FAM 0863 0 0 0 -9
FAM 0864 0 0 0 -9
FAM 0865 0 0 0 -9
FAM 0866 0 0 0 -9
FAM 0867 0 0 0 -9
FAM 0868 0 0 0 -9
FAM 0869 0 0 0 -9
FAM 0870 0 0 0 -9
FAM 0871 0 0 0 -9
FAM 0872 0 0 0 -9
FAM 0873 0 0 0 -9
FAM 0874 0 0 0 -9
FAM 0875 0 0 0 -9
FAM 0876 0 0 0 -9
FAM 0877 0 0 0 -9
FAM 0878 0 0 0 -9
FAM 0879 0 0 0 -9
FAM 0880 0 0 0 -9
FAM 0881 0 0 0 -9
FAM 0882 0 0 0 -9
FAM 0883 0 0 0 -9
FAM 0884 0 0 0 -9
FAM 0885 0 0 0 -9
FAM 0886 0 0 0 -9
FAM 0887 0 0 0 -9
FAM 0888 0 0 0 -9
FAM 0889 0 0 0 -9
FAM 0890 0 0 0 -9
FAM 0891 0 0 0 -9
FAM 0892 0 0 0 -9
FAM 0893 0 0 0 -9
FAM 0894 0 0 0 -9
FAM 0895 0 0 0 -9
FAM 0896 0 0 0 -9
FAM 0897 0 0 0 -9
FAM 0898 0 0 0 -9
FAM 0899 0 0 0 -9
FAM 0900 0 0 0 -9
FAM 0901 0 0 0 -9
FAM 0902 0 0 0 -9
FAM 0903 0 0 0 -9
FAM 0904 0 0 0 -9
FAM 0905 0 0 0 -9
FAM 0906 0 0 0 -9
FAM 0907 0 0 0 -9
FAM 0908 0 0 0 -9
FAM 0909 0 0 0 -9
FAM 0910 0 0 0 -9
FAM 0911 0 0 0 -9
FAM 0912 0 0 0 -9
FAM 0913 0 0 0 -9
FAM 0914 0 0 0 -9
FAM 0915 0 0 0 -9
FAM 0916 0 0 0 -9
FAM 0917 0 0 0 -9
FAM 0918 0 0 0 -9
FAM 0919 0 0 0 -9
FAM 0920 0 0 0 -9
FAM 0921 0 0 0 -9
FAM 0922 0 0 0 -9
FAM 0923 0 0 0 -9
FAM 0924 0 0 0 -9
FAM 0925 0 0 0 -9
FAM 0926 0 0 0 -9
FAM 0927 0 0 0 -9
FAM 0928 0 0 0 -9
FAM 0929 0 0 0 -9
FAM 0930 0 0 0 -9
FAM 0931 0 0 0 -9
FAM 0932 0 0 0 -9
FAM 0933 0 0 0 -9
FAM 0934 0 0 0 -9
FAM 0935 0 0 0 -9
FAM 0936 0 0 0 -9
FAM 0937 0 0 0 -9
FAM 0938 0 0 0 -9
FAM 0939 0 0 0 -9
FAM 0940 0 0 0 -9
FAM 0941 0 0 0 -9
FAM 0942 0 0 0 -9
FAM 0943 0 0 0 -9
FAM 0944 0 0 0 -9
FAM 0945 0 0 0 -9
FAM 0946 0 0 0 -9
FAM 0947 0 0 0 -9
FAM 0948 0 0 0 -9
FAM 0949 0 0 0 -9
FAM 0950 0 0 0 -9
FAM 0951 0 0 0 -9
FAM 0952 0 0 0 -9
FAM 0953 0 0 0 -9
FAM 0954 0 0 0 -9
FAM 0955 0 0 0 -9
FAM 0956 0 0 0 -9
FAM 0957 0 0 0 -9
FAM 0958 0 0 0 -9
FAM 0959 0 0 0 -9
FAM 0960 0 0 0 -9
FAM 0961 0 0 0 -9
FAM 0962 0 0 0 -9
FAM 0963 0 0 0 -9
FAM 0964 0 0 0 -9
FAM 0965 0 0 0 -9
FAM 0966 0 0 0 -9
FAM 0967 0 0 0 -9
FAM 0968 0 0 0 -9
FAM 0969 0 0 0 -9
FAM 0970 0 0 0 -9
FAM 0971 0 0 0 -9
FAM 0972 0 0 0 -9
FAM 0973 0 0 0 -9
FAM 0974 0 0 0 -9
FAM 0975 0 0 0 -9
FAM 0976 0 0 0 -9
FAM 0977 0 0 0 -9
FAM 0978 0 0 0 -9
FAM 0979 0 0 0 -9
FAM 0980 0 0 0 -9
FAM 0981 0 0 0 -9
FAM 0982 0 0 0 -9
FAM 0983 0 0 0 -9
FAM 0984 0 0 0 -9
FAM 0985 0 0 0 -9
FAM 0986 0 0 0 -9
FAM 0987 0 0 0 -9
FAM 0988 0 0 0 -9
FAM 0989 0 0 0 -9
FAM 0990 0 0 0 -9
FAM 0991 0 0 0 -9
FAM 0992 0 0 0 -9
FAM 0993 0 0 0 -9
FAM 0994 0 0 0 -9
FAM 0995 0 0 0 -9
FAM 0996 0 0 0 -9
FAM 0997 0 0 0 -9
FAM 0998 0 0 0 -9
FAM 0999 0 0 0 -9
FAM 1000 0 0 0 -9
FAM 1001 0 0 0 -9
FAM 1002 0 0 0 -9
FAM 1003 0 0 0 -9
FAM 1004 0 0 0 -9
FAM 1005 0 0 0 -9
FAM 1006 0 0 0 -9
FAM 1007 0 0 0 -9
FAM 1008 0 0 0 -9
FAM 1009 0 0 0 -9
FAM 1010 0 0 0 -9
FAM 1011 0 0 0 -9
FAM 1012 0 0 0 -9
FAM 1013 0 0 0 -9
FAM 1014 0 0 0 -9
FAM 1015 0 0 0 -9
FAM 1016 0 0 0 -9
FAM 1017 0 0 0 -9
FAM 1018 0 0 0 -9
FAM 1019 0 0 0 -9
FAM 1020 0 0 0 -9
FAM 1021 0 0 0 -9
FAM 1022 0 0 0 -9
FAM 1023 0 0 0 -9
FAM 1024 0 0 0 -9
FAM 1025 0 0 0 -9
FAM 1026 0 0 0 -9
FAM 1027 0 0 0 -9
FAM 1028 0 0 0 -9
FAM 1029 0 0 0 -9
FAM 1030 0 0 0 -9
FAM 1031 0 0 0 -9
FAM 1032 0 0 0 -9
FAM 1033 0 0 0 -9
FAM 1034 0 0 0 -9
FAM 1035 0 0 0 -9
FAM 1036 0 0 0 -9
FAM 1037 0 0 0 -9
FAM 1038 0 0 0 -9
FAM 1039 0 0 0 -9
FAM 1040 0 0 0 -9
FAM 1041 0 0 0 -9
FAM 1042 0 0 0 -9
FAM 1043 0 0 0 -9
FAM 1044 0 0 0 -9
FAM 1045 0 0 0 -9
FAM 1046 0 0 0 -9
FAM 1047 0 0 0 -9
FAM 1048 0 0 0 -9
FAM 1049 0 0 0 -9
FAM 1050 0 0 0 -9
FAM 1051 0 0 0 -9
FAM 1052 0 0 0 -9
FAM 1053 0 0 0 -9
FAM 1054 0 0 0 -9
FAM 1055 0 0 0 -9
FAM 1056 0 0 0 -9
FAM 1057 0 0 0 -9
FAM 1058 0 0 0 -9
FAM 1059 0 0 0 -9
FAM 1060 0 0 0 -9
FAM 1061 0 0 0 -9
FAM 1062 0 0 0 -9
FAM 1063 0 0 0 -9
FAM 1064 0 0 0 -9
FAM 1065 0 0 0 -9
FAM 1066 0 0 0 -9
FAM 1067 0 0 0 -9
FAM 1068 0 0 0 -9
FAM 1069 0 0 0 -9
FAM 1070 0 0 0 -9
FAM 1071 0 0 0 -9
FAM 1072 0 0 0 -9
FAM 1073 0 0 0 -9
FAM 1074 0 0 0 -9
FAM 1075 0 0 0 -9
FAM 1076 0 0 0 -9
FAM 1077 0 0 0 -9
FAM 1078 0 0 0 -9
FAM 1079 0 0 0 -9
FAM 1080 0 0 0 -9
FAM 1081 0 0 0 -9
FAM 1082 0 0 0 -9
FAM 1083 0 0 0 -9
FAM 1084 0 0 0 -9
FAM 1085 0 0 0 -9
FAM 1086 0 0 0 -9
FAM 1087 0 0 0 -9
FAM 1088 0 0 0 -9
FAM 1089 0 0 0 -9
FAM 1090 0 0 0 -9
FAM 1091 0 0 0 -9
FAM 1092 0 0 0 -9
FAM 1093 0 0 0 -9
FAM 1094 0 0 0 -9
FAM 1095 0 0 0 -9
FAM 1096 0 0 0 -9
FAM 1097 0 0 0 -9
FAM 1098 0 0 0 -9
FAM 1099 0 0 0 -9
FAM 1100 0 0 0 -9
FAM 1101 0 0 0 -9
FAM 1102 0 0 0 -9
FAM 1103 0 0 0 -9
FAM 1104 0 0 0 -9
FAM 1105 0 0 0 -9
FAM 1106 0 0 0 -9
FAM 1107 0 0 0 -9
FAM 1108 0 0 0 -9
FAM 1109 0 0 0 -9
FAM 1110 0 0 0 -9
FAM 1111 0 0 0 -9
FAM 1112 0 0 0 -9
FAM 1113 0 0 0 -9
FAM 1114 0 0 0 -9
FAM 1115 0 0 0 -9
FAM 1116 0 0 0 -9
FAM 1117 0 0 0 -9
FAM 1118 0 0 0 -9
FAM 1119 0 0 0 -9
FAM 1120 0 0 0 -9
FAM 1121 0 0 0 -9
FAM 1122 0 0 0 -9
FAM 1123 0 0 0 -9
FAM 1124 0 0 0 -9
FAM 1125 0 0 0 -9
FAM 1126 0 0 0 -9
FAM 1127 0 0 0 -9
FAM 1128 0 0 0 -9
FAM 1129 0 0 0 -9
FAM 1130 0 0 0 -9
FAM 1131 0 0 0 -9
FAM 1132 0 0 0 -9
FAM 1133 0 0 0 -9
FAM 1134 0 0 0 -9
FAM 1135 0 0 0 -9
FAM 1136 0 0 0 -9
FAM 1137 0 0 0 -9
FAM 1138 0 0 0 -9
FAM 1139 0 0 0 -9
FAM 1140 0 0 0 -9
FAM 1141 0 0 0 -9
FAM 1142 0 0 0 -9
FAM 1143 0 0 0 -9
FAM 1144 0 0 0 -9
FAM 1145 0 0 0 -9
FAM 1146 0 0 0 -9
FAM 1147 0 0 0 -9
FAM 1148 0 0 0 -9
FAM 1149 0 0 0 -9
FAM 1150 0 0 0 -9
FAM 1151 0 0 0 -9
FAM 1152 0 0 0 -9
FAM 1153 0 0 0 -9
FAM 1154 0 0 0 -9
FAM 1155 0 0 0 -9
FAM 1156 0 0 0 -9
FAM 1157 0 0 0 -9
FAM 1158 0 0 0 -9
FAM 1159 0 0 0 -9
FAM 1160 0 0 0 -9
FAM 1161 0 0 0 -9
FAM 1162 0 0 0 -9
FAM 1163 0 0 0 -9
FAM 1164 0 0 0 -9
FAM 1165 0 0 0 -9
FAM 1166 0 0 0 -9
FAM 1167 0 0 0 -9
FAM 1168 0 0 0 -9
FAM 1169 0 0 0 -9
FAM 1170 0 0 0 -9
FAM 1171 0 0 0 -9
FAM 1172 0 0 0 -9
FAM 1173 0 0 0 -9
FAM 1174 0 0 0 -9
FAM 1175 0 0 0 -9
FAM 1176 0 0 0 -9
FAM 1177 0 0 0 -9
FAM 1178 0 0 0 -9
FAM 1179 0 0 0 -9
FAM 1180 0 0 0 -9
FAM 1181 0 0 0 -9
FAM 1182 0 0 0 -9
FAM 1183 0 0 0 -9
FAM 1184 0 0 0 -9
FAM 1185 0 0 0 -9
FAM 1186 0 0 0 -9
FAM 1187 0 0 0 -9
FAM 1188 0 0 0 -9
FAM 1189 0 0 0 -9
